# Supplementary material
Source: publisher figshare collection journal article supplement (https://tandf.figshare.com/ndownloader/files/15168407)
Supplement: Supplementary file 1 [file 15168407]

**Figure S1.** Inductively coupled plasma-optical emission spectrometry (ICP-OES) analyses of **BCCMNPs-VI**.

| **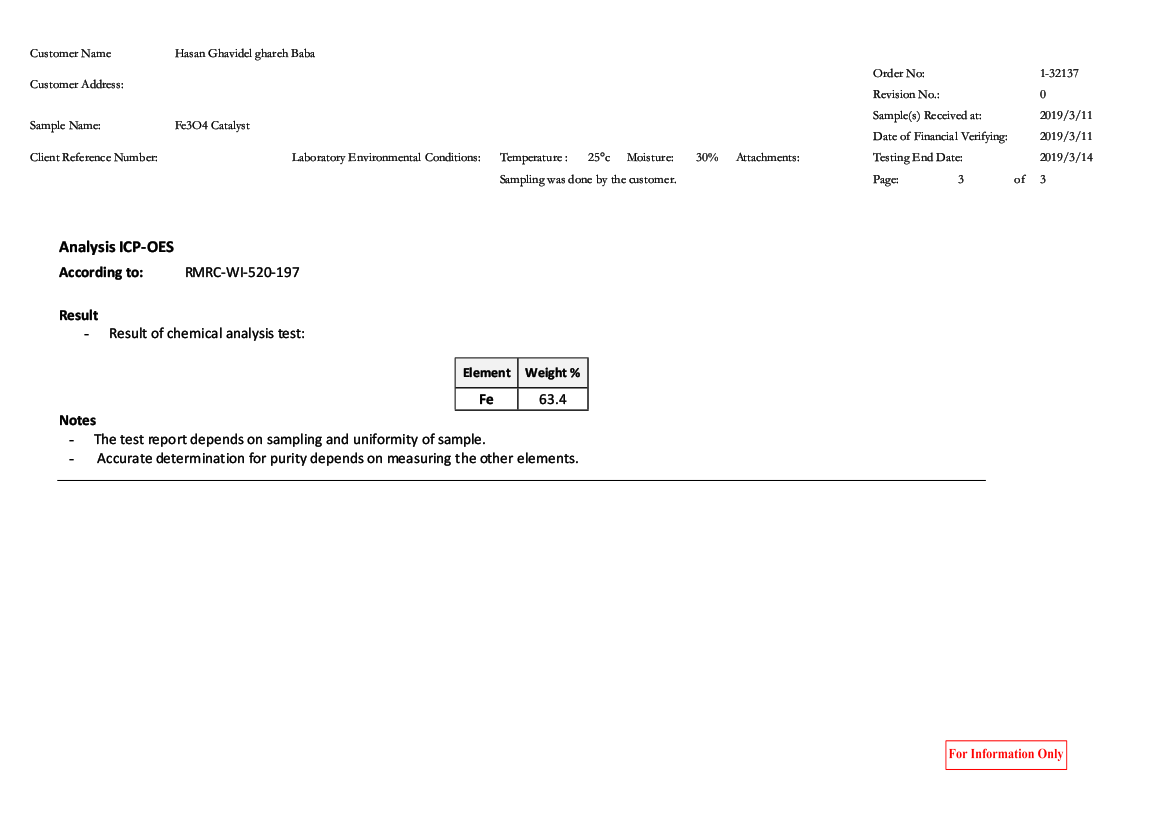** |
| --- |

**Figure S2.** FT-IR spectra of immature **CCMNPs** (a); **BCCMNPs-VI** (b); and the reclaimable **BCCMNPs-VI** after nine runs (c).

| **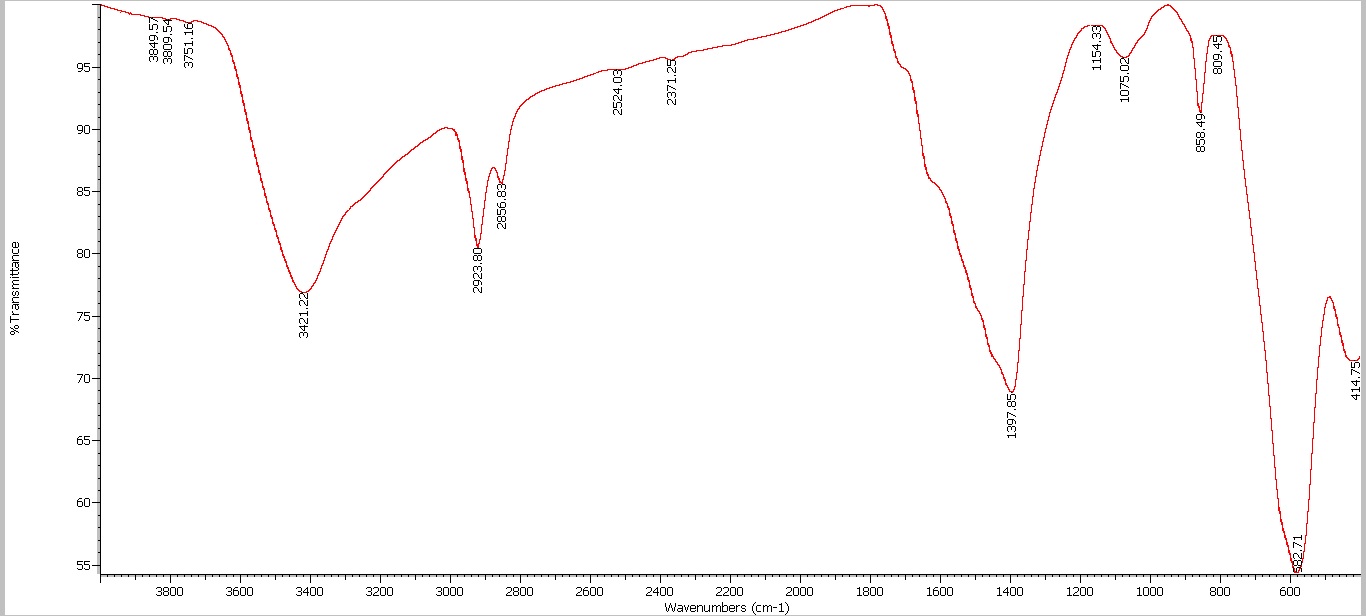** |
| --- |
| **CCMNPs** (a) |
|  |
| 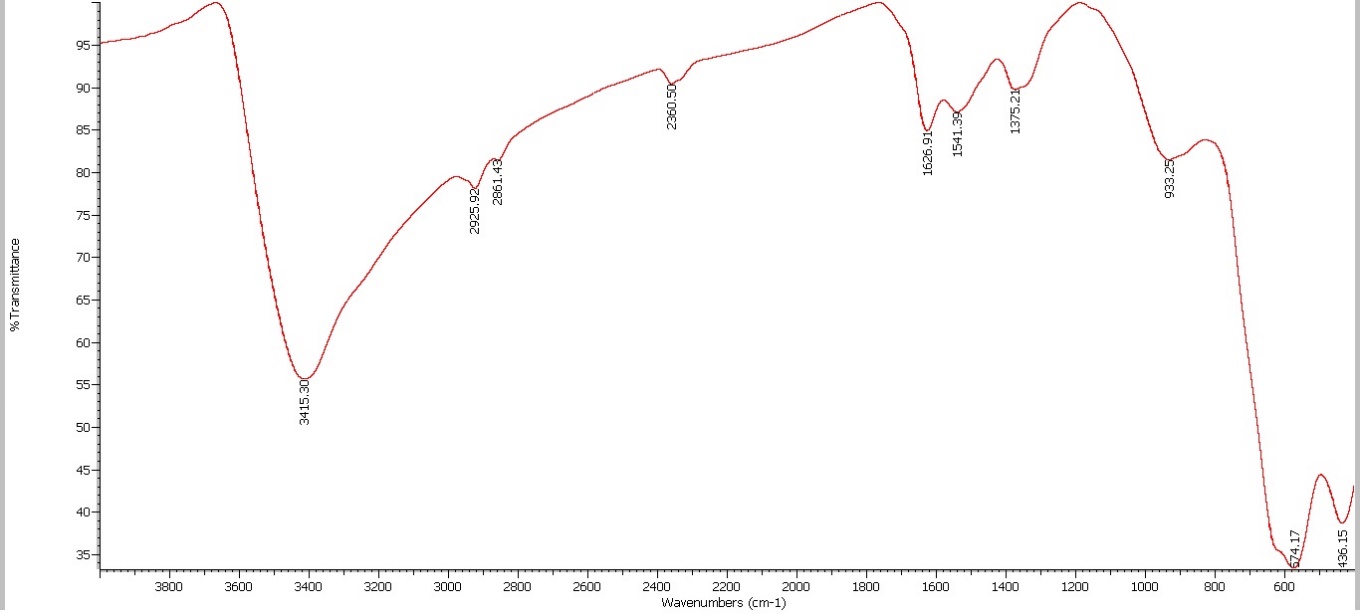 |
| **BCCMNPs-VI** (b) |
|  |
| **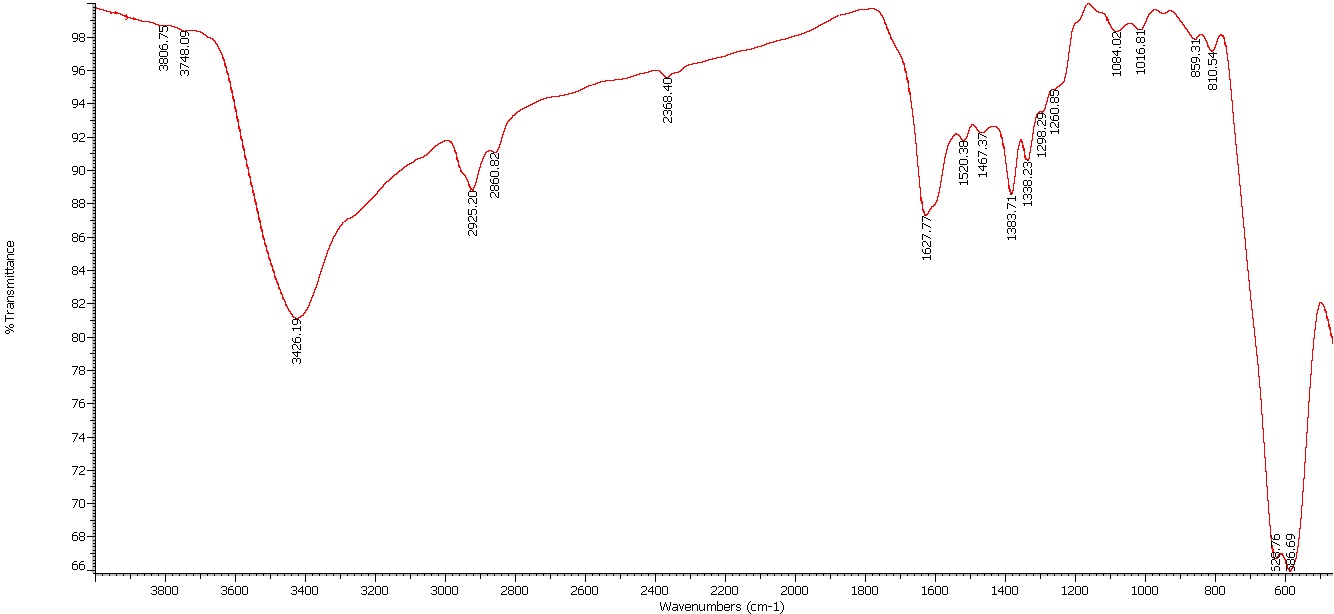** |
| **BCCMNPs-VI** after nine runs (c). |

**Figure S3.** XRD patterns of immature **CCMNPs** (a); **BCCMNPs-VI** (b); and the reclaimable **BCCMNPs-VI** after nine runs (c).

| **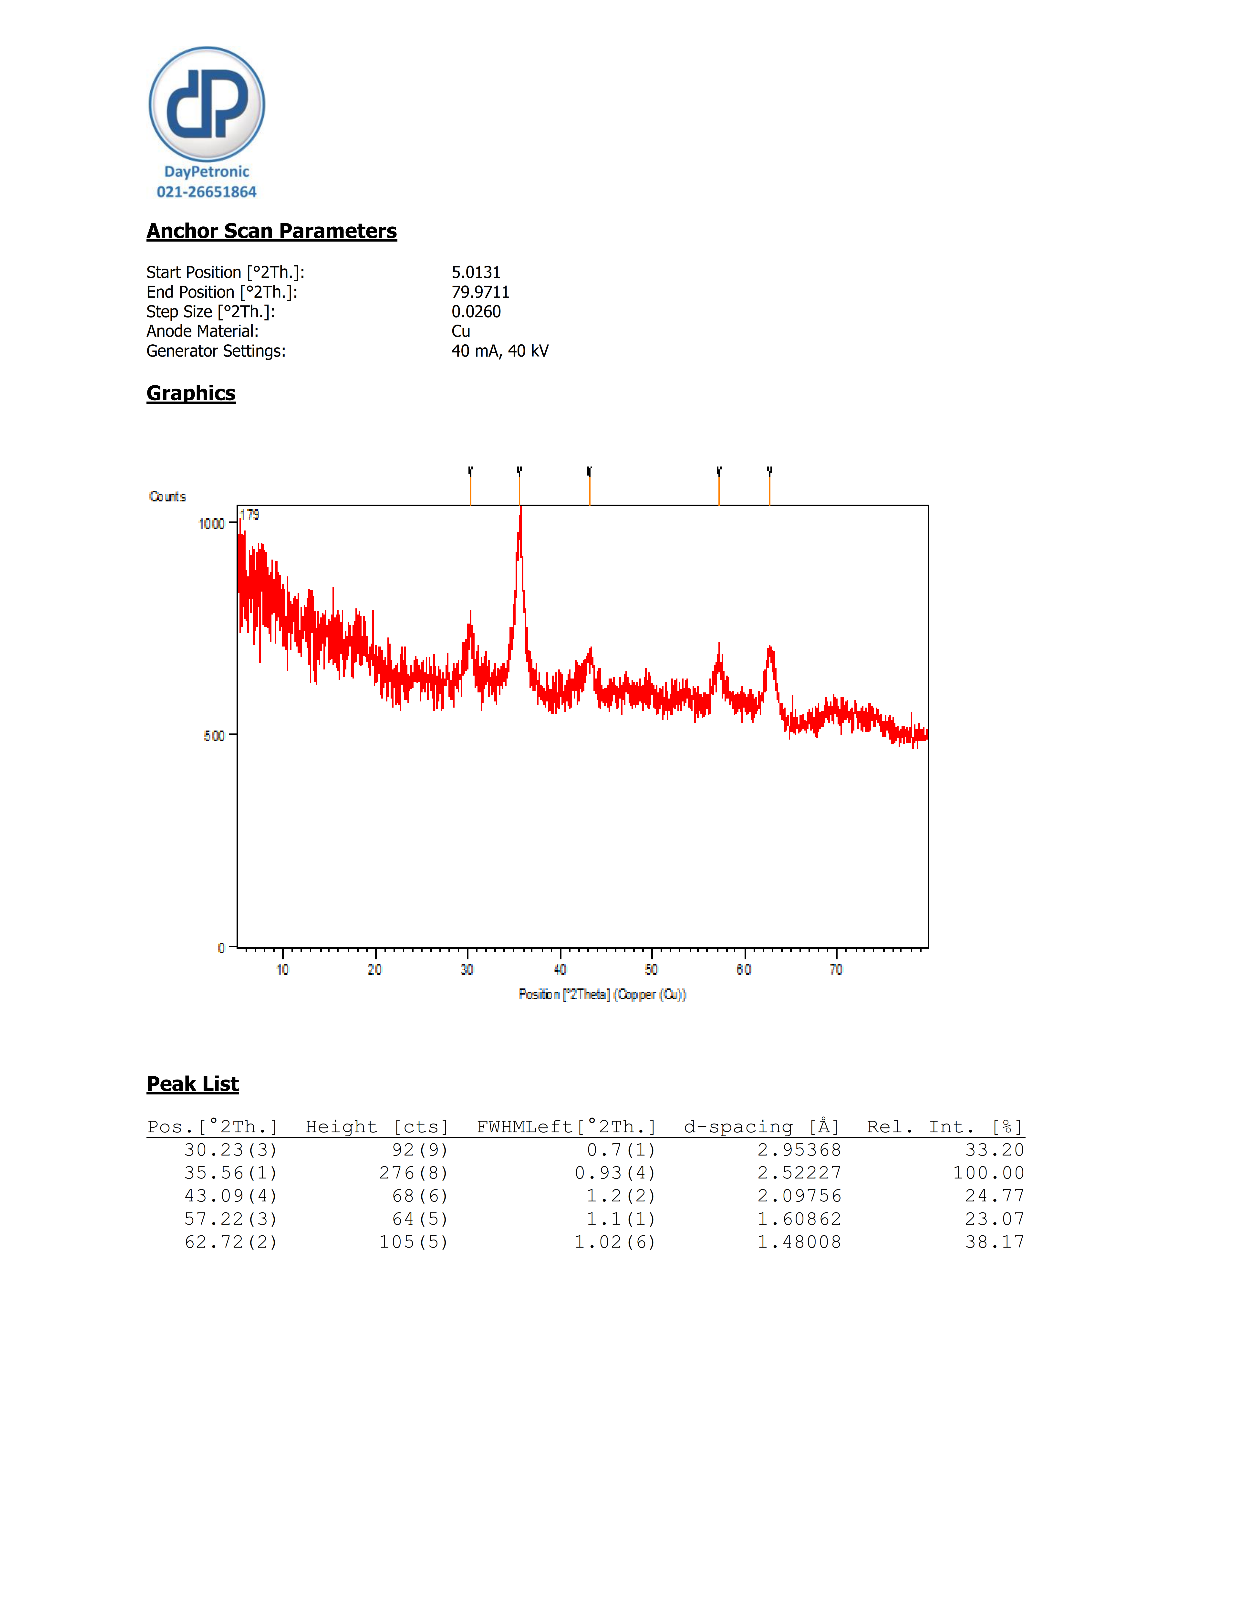** |
| --- |
| **CCMNPs** (a) |
|  |
| **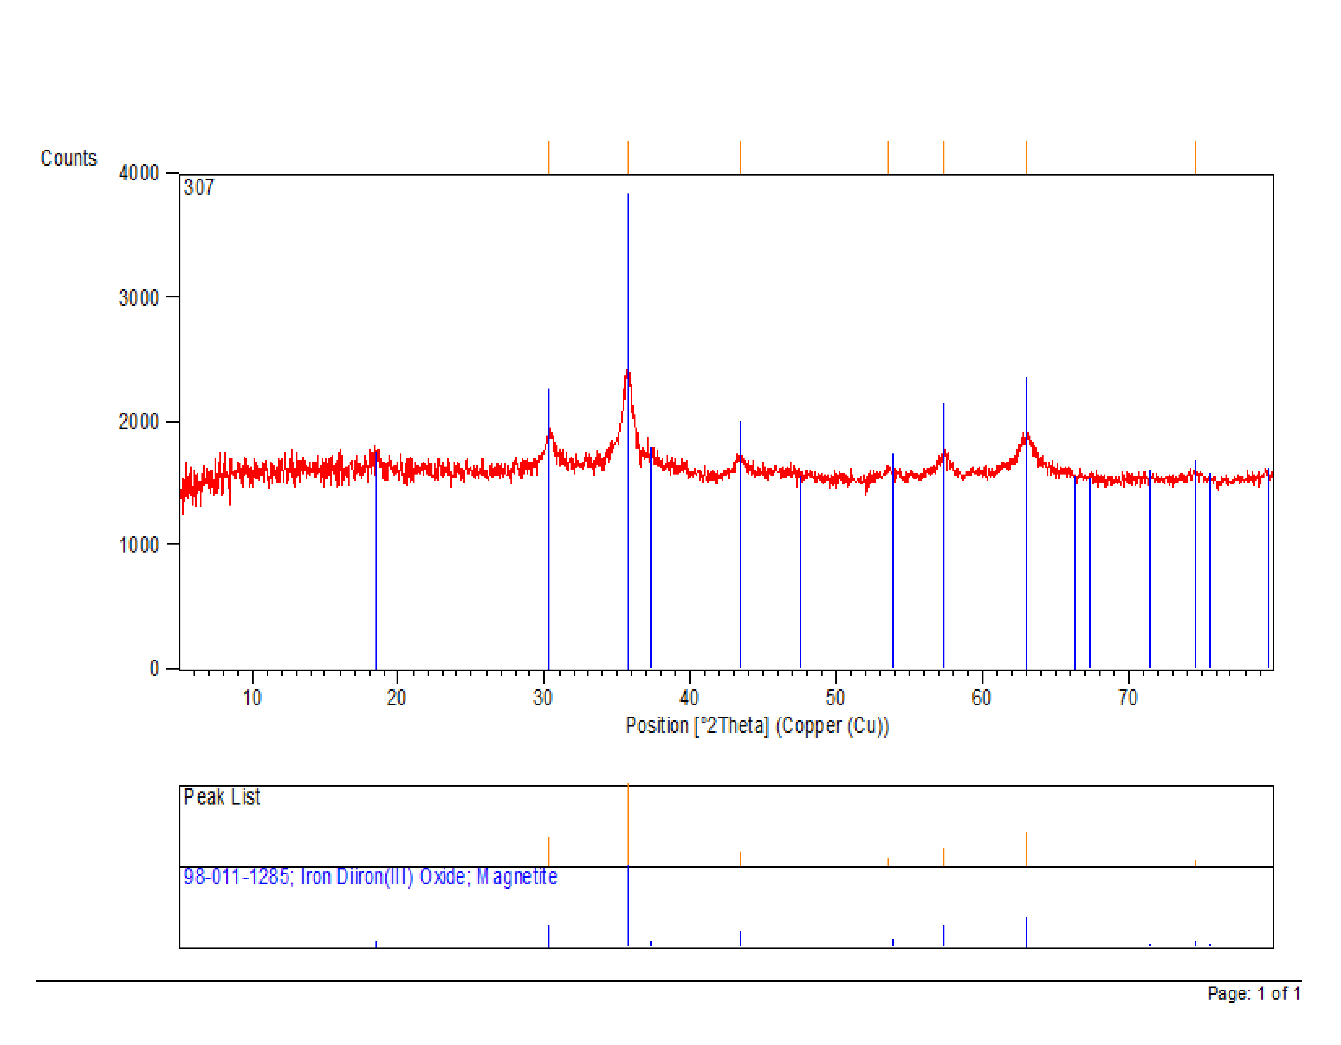** |
| **BCCMNPs-VI (b)** |
|  |
| **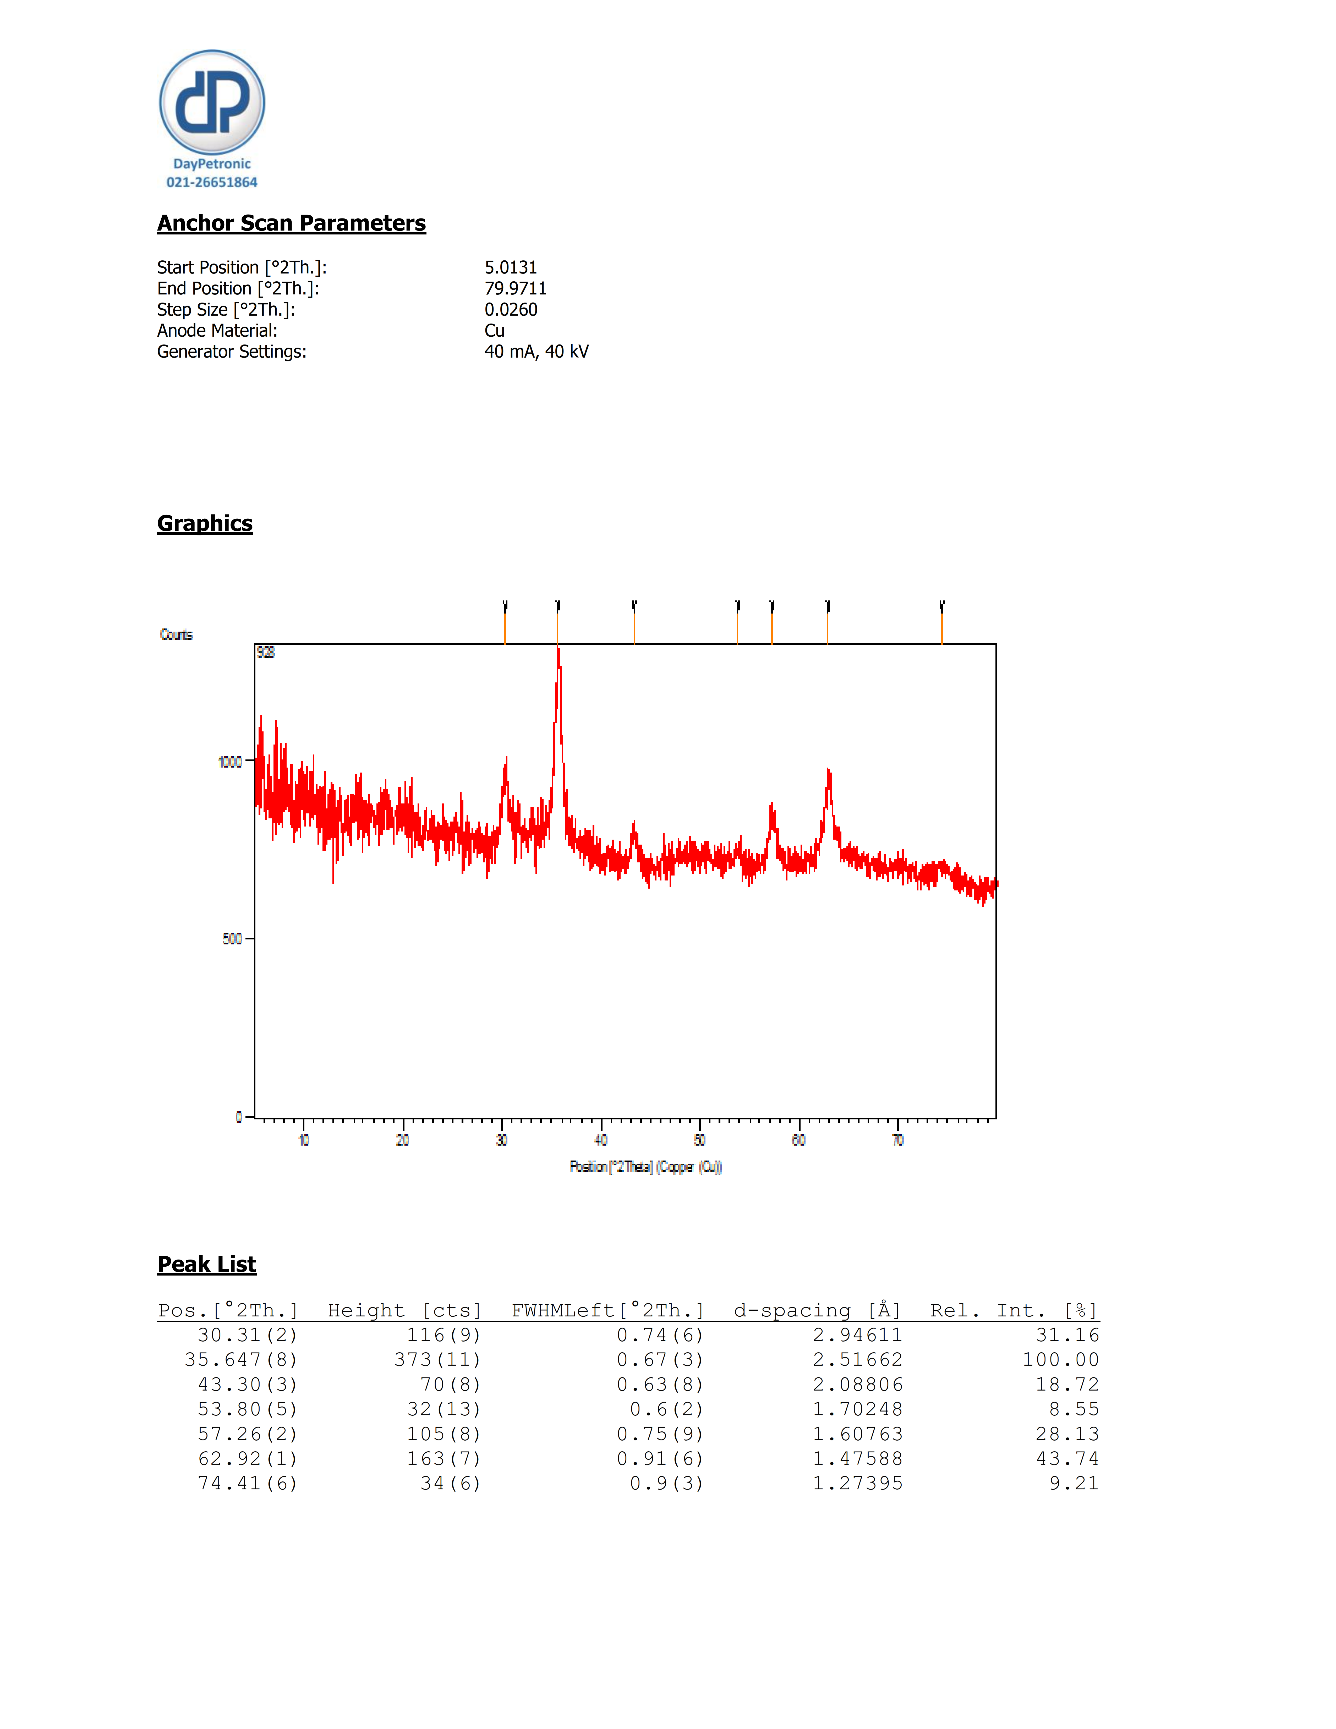** |
| **the reclaimable BCCMNPs-VI after nine runs (c)** |

**Figure S4.** Thermal gravimetric analysis (TGA) and derivative thermal gravimetric (DTG) diagrams of the **CCMNPs** (a); and **BCCMNPs-VI** (b); along with differential scanning calorimetry (DSC) diagram of the **BCCMNPs-VI** (c).

| **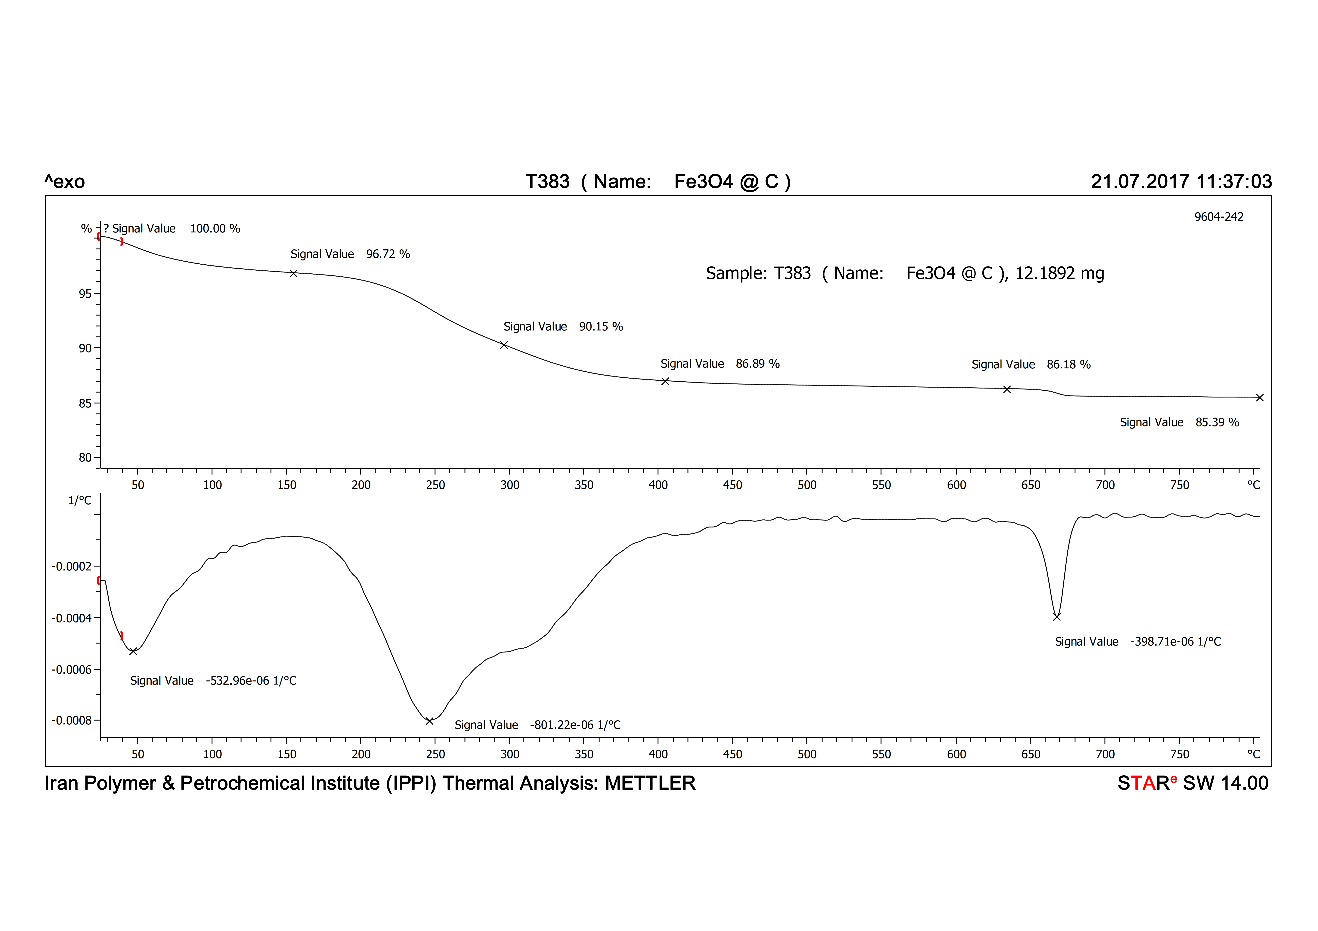** |
| --- |
| **CCMNPs** (a) |
|  |
| **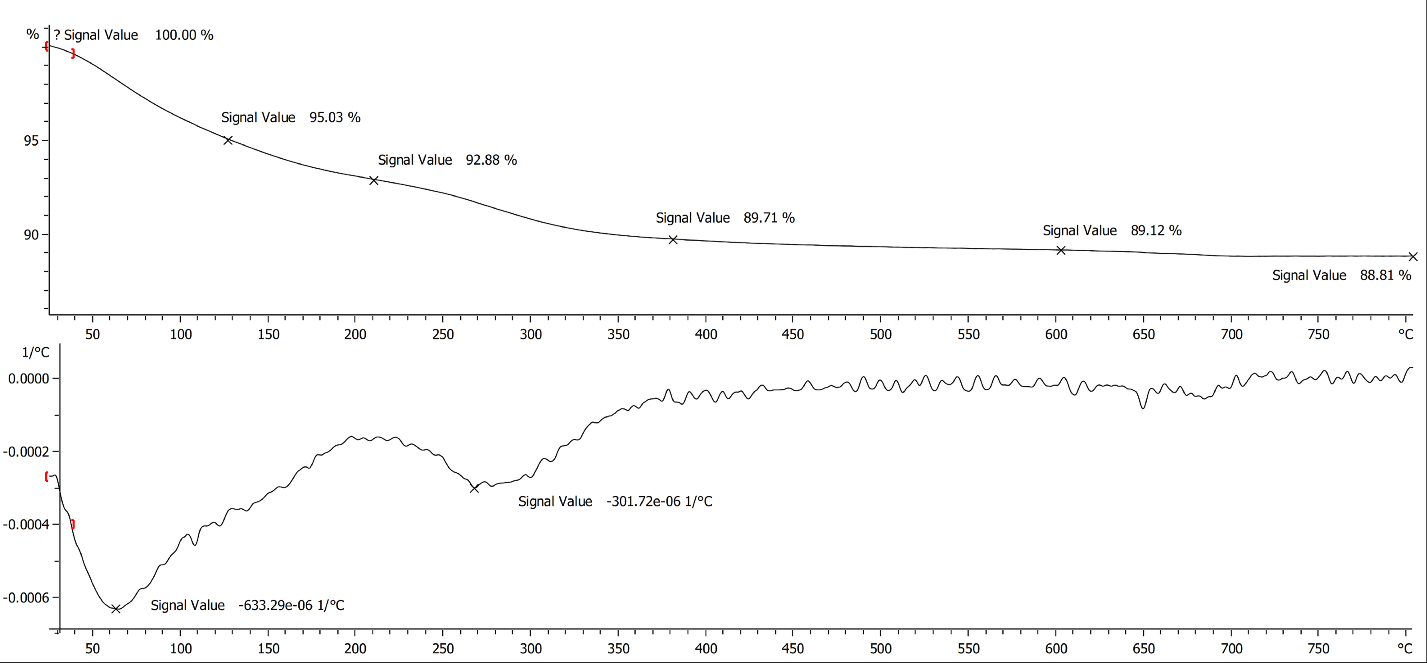** |
| **BCCMNPs-VI** (b). |
|  |
| **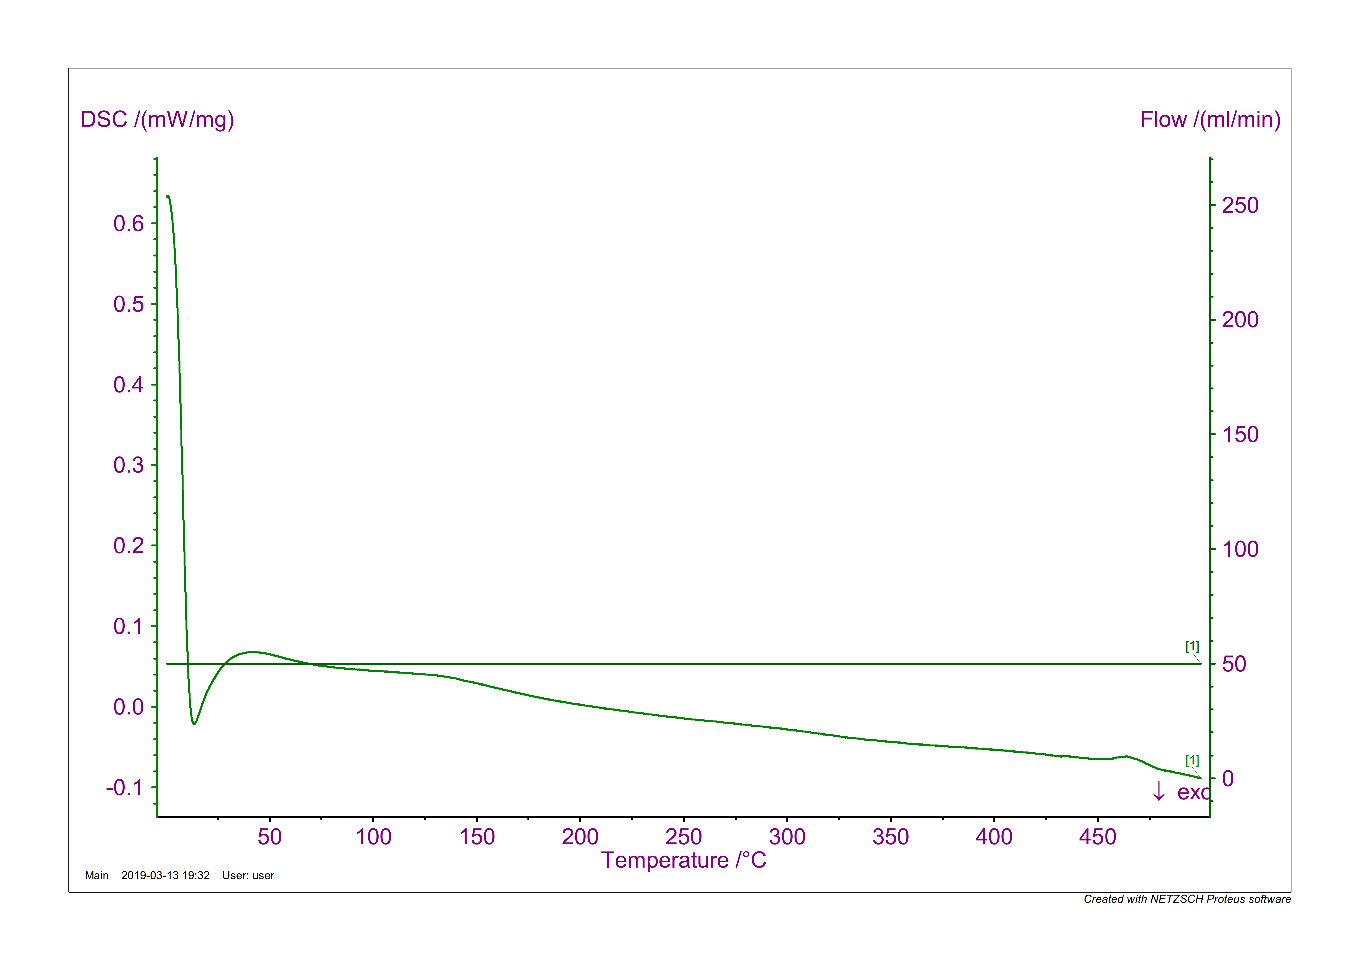** |
| (c) |

**Figure S5**. VSM analysis of **CCMNPs** (a); **BCCMNPs-VI** (b); and the reclaimable **BCCMNPs-VI** after nine runs (c) at room temperature.

| **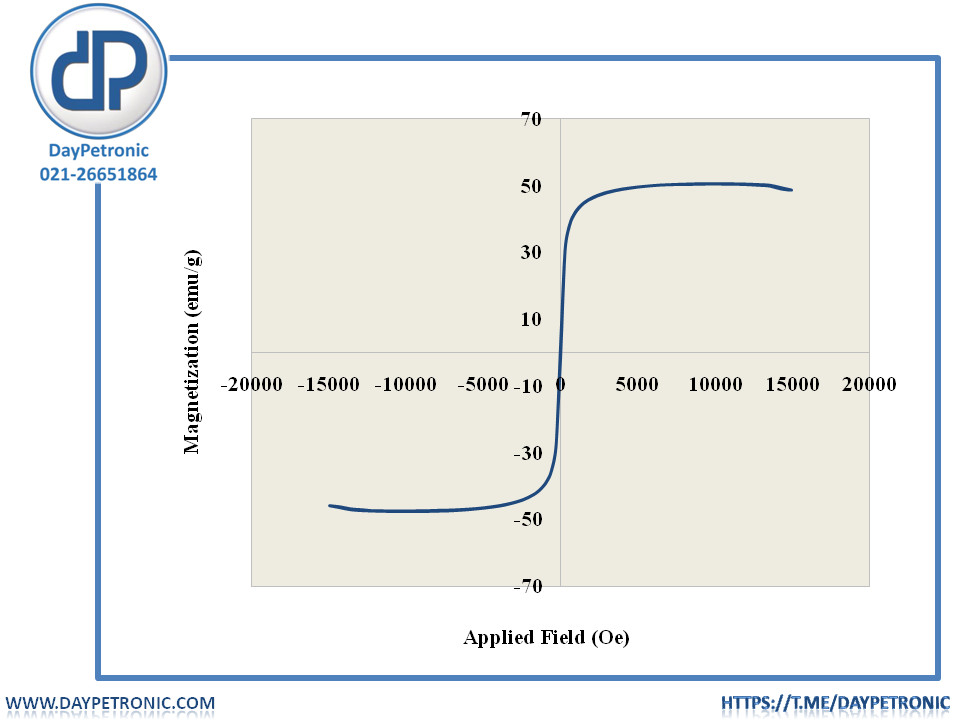** |
| --- |
| **CCMNPs** (a); |
|  |
| **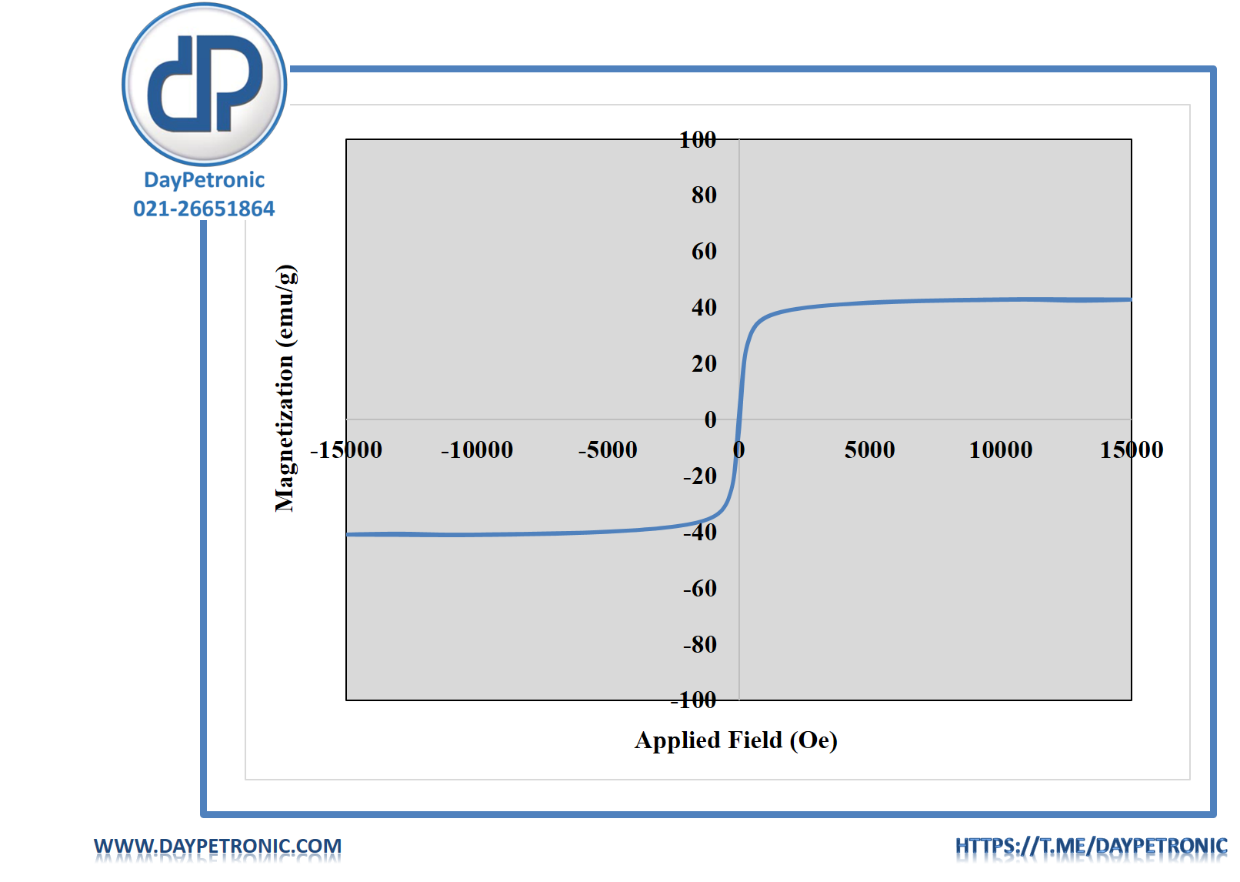** |
| **BCCMNPs-VI** (b); |
|  |
| **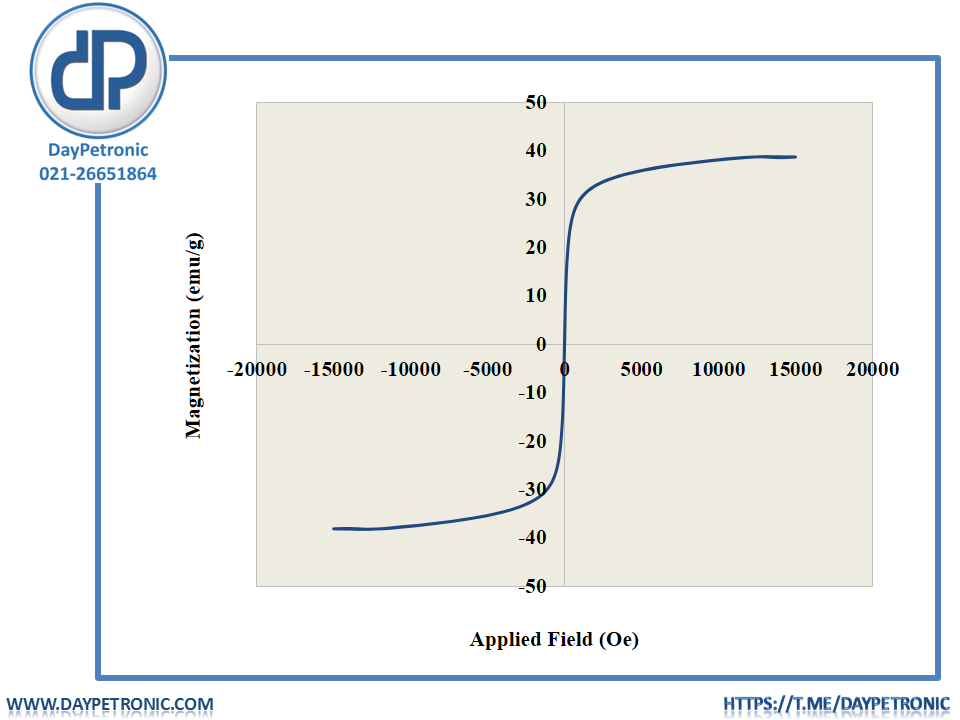** |
| the reclaimable **BCCMNPs-VI** after nine runs (c) |

**Figure S6.** EDX analysis of **BCCMNPs-VI**.

| **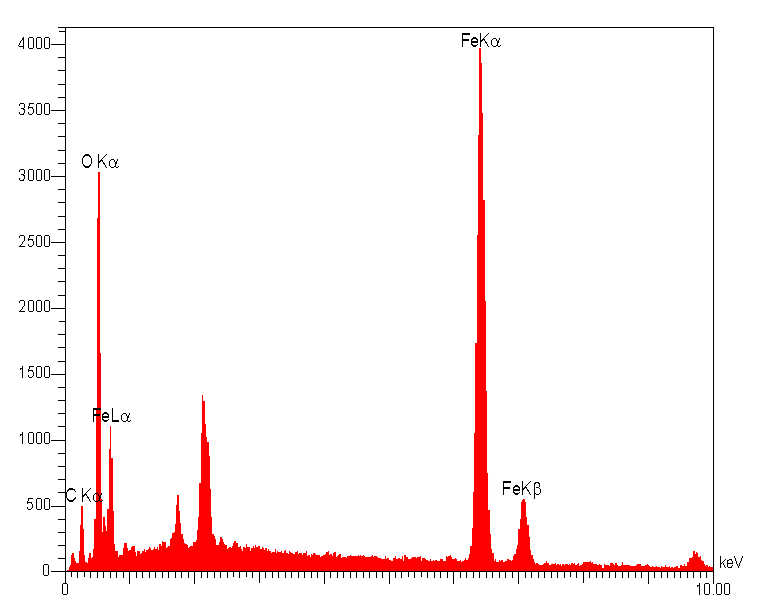** |
| --- |

**Figure S7.** SEM image of **CCMNPs** (a); and **BCCMNPs-VI** (b).

|  | **** |
| --- | --- |
| **CCMNPs** (a) | |
|  |  |
| **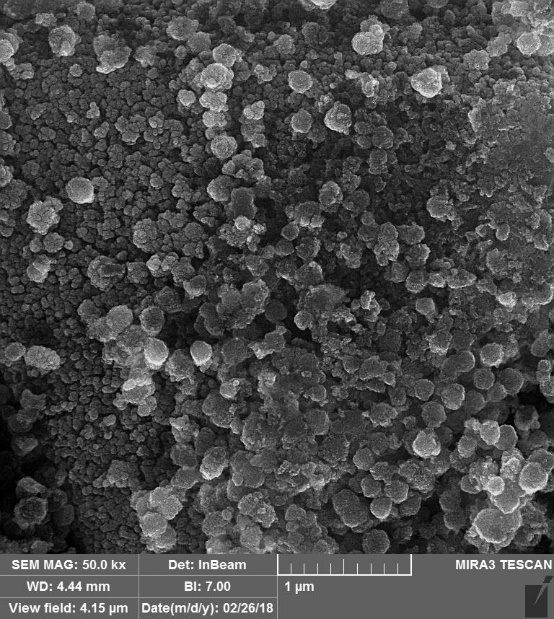** | **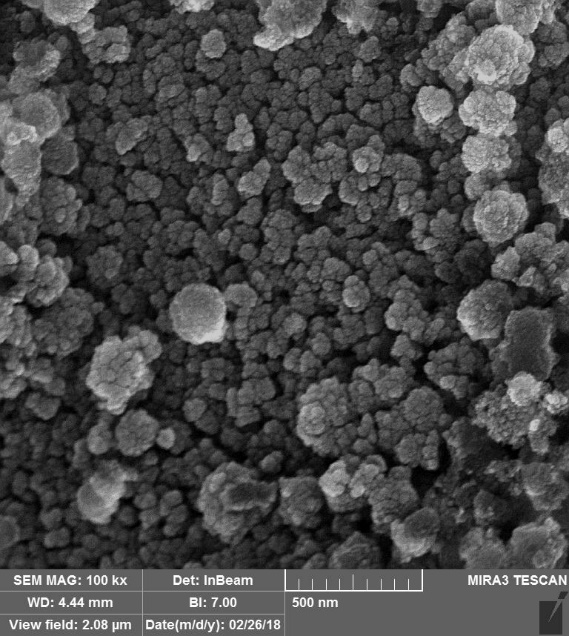** |
| **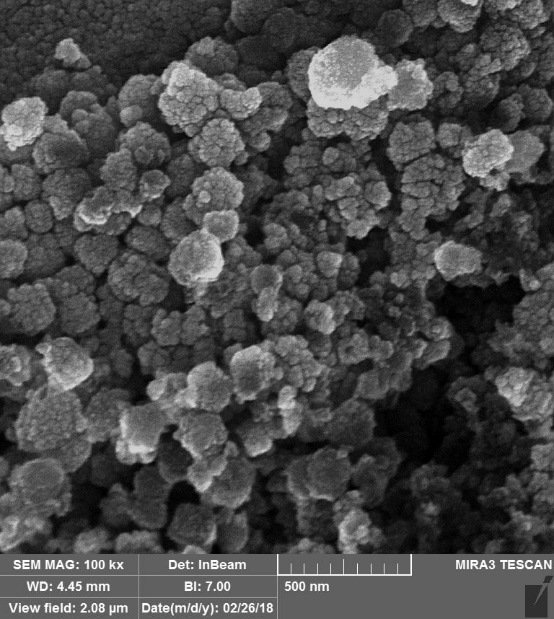** | **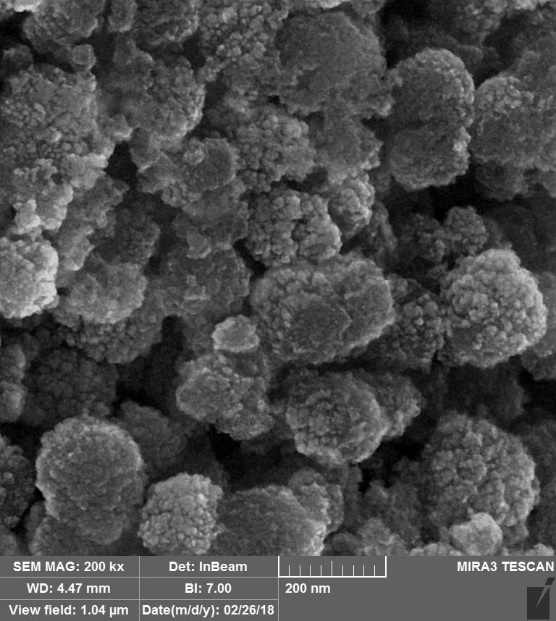** |
| **BCCMNPs-VI** (b) | |

**Figure S8.** TEM image of **BCCMNPs-VI**.

| **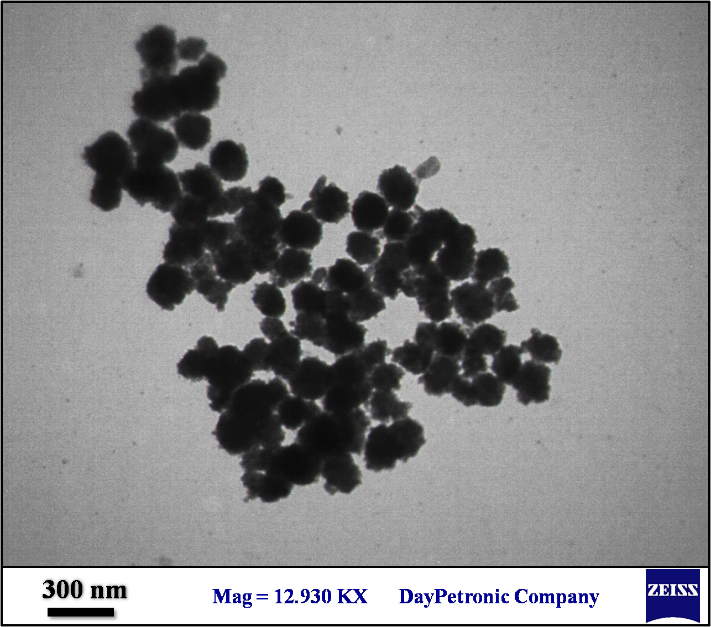** | **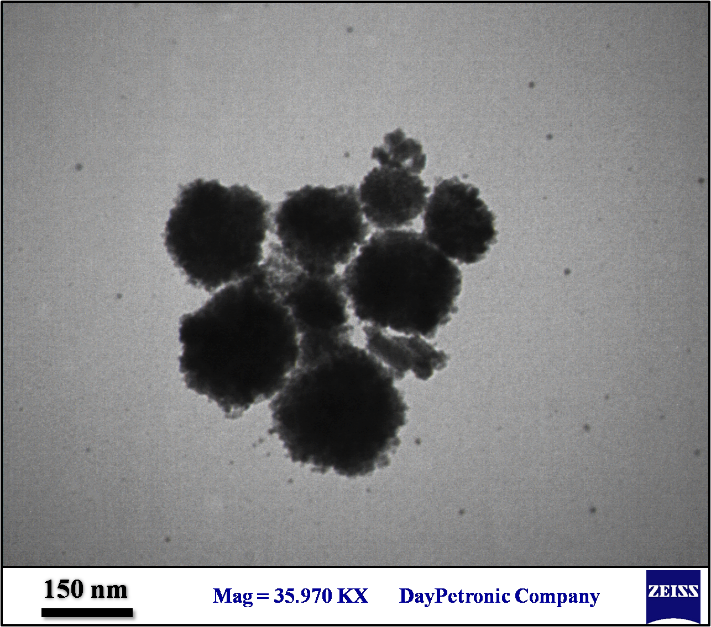** |
| --- | --- |
| **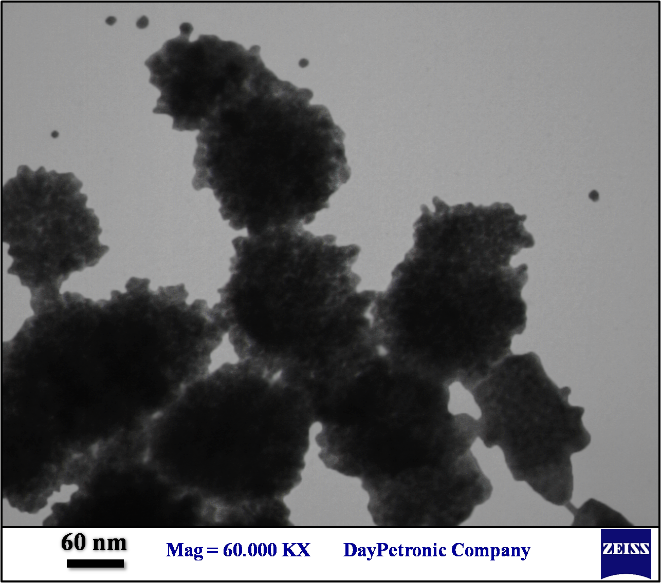** | **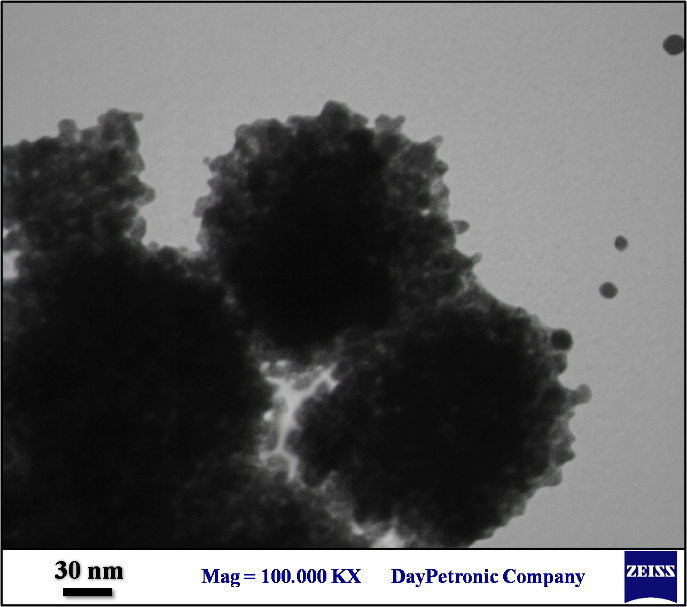** |

**Figure S9. FT-IR spectra of some selected compounds:**

|  |
| --- |
| **FT-IR spectra of 4d** |
|  |
| 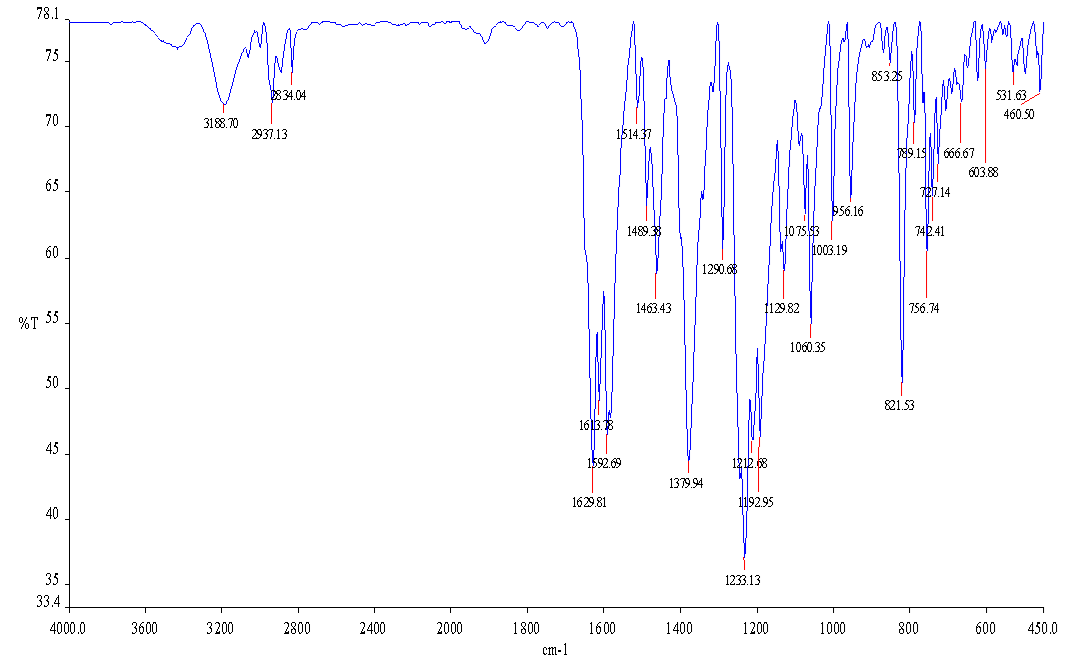 |
| **FT-IR spectra of 4f** |
|  |
| 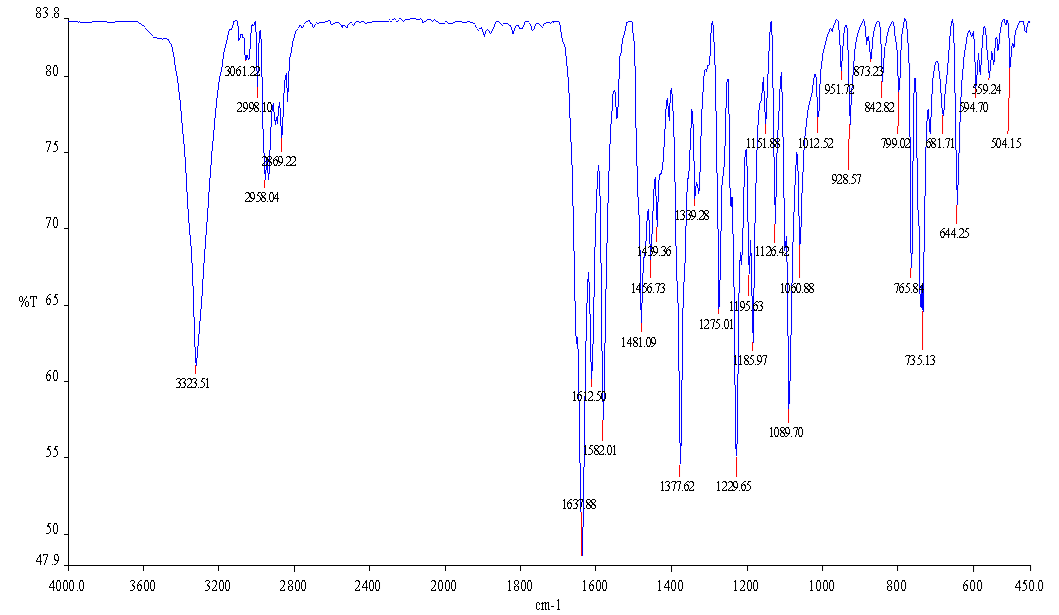 |
| **FT-IR spectra of 4i** |
|  |
| **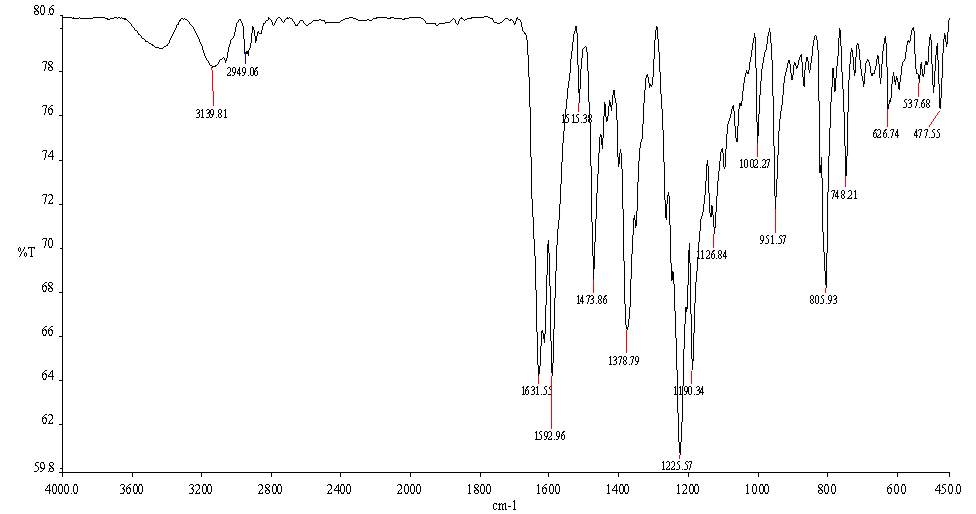** |
| **FT-IR spectra of 4k** |
|  |
| **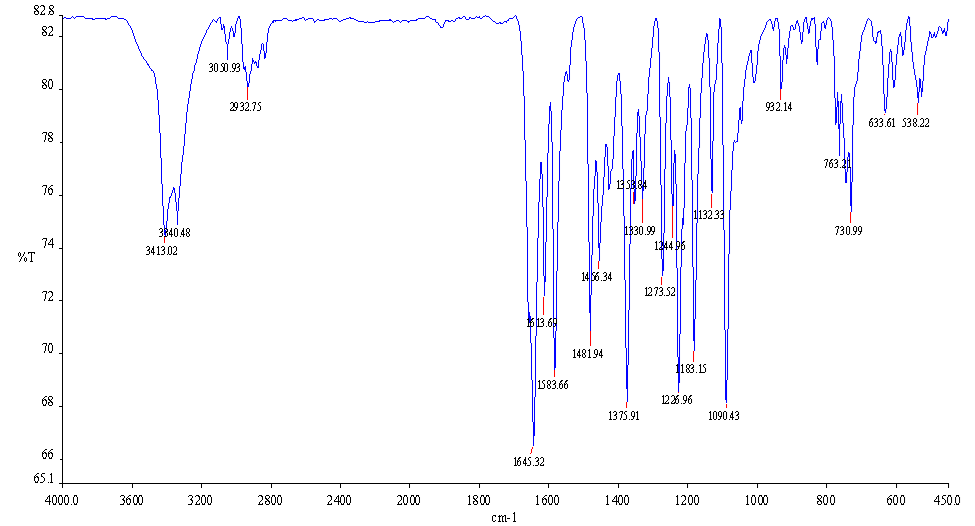** |
| **FT-IR spectra of 4m** |

**S10. 1H and 13C NMR spectra of some selected compounds:**

| **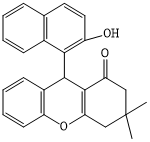**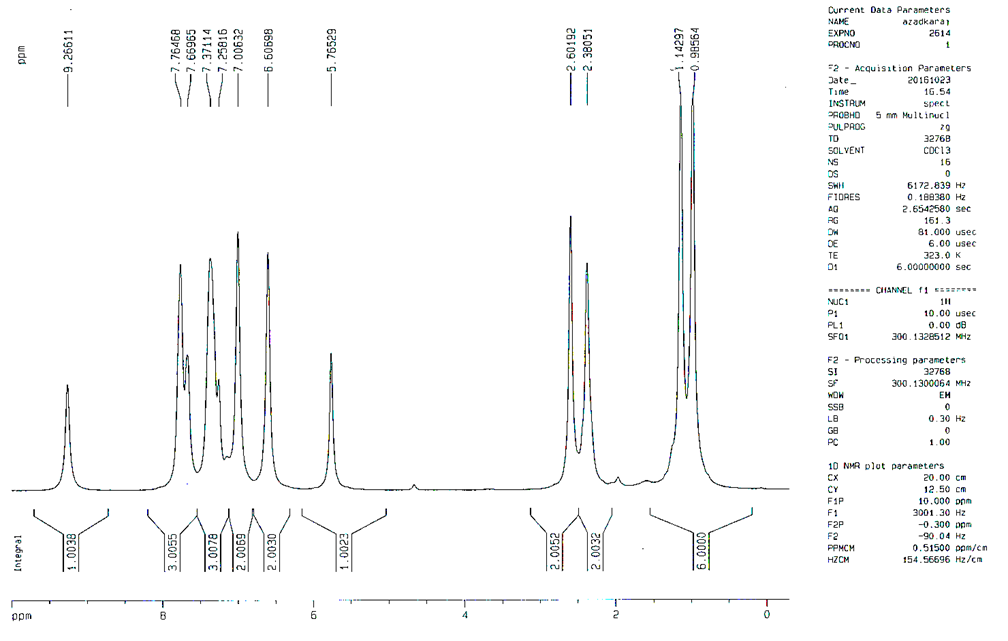 |
| --- |
| **1H NMR of 4a** |
| **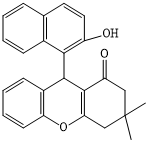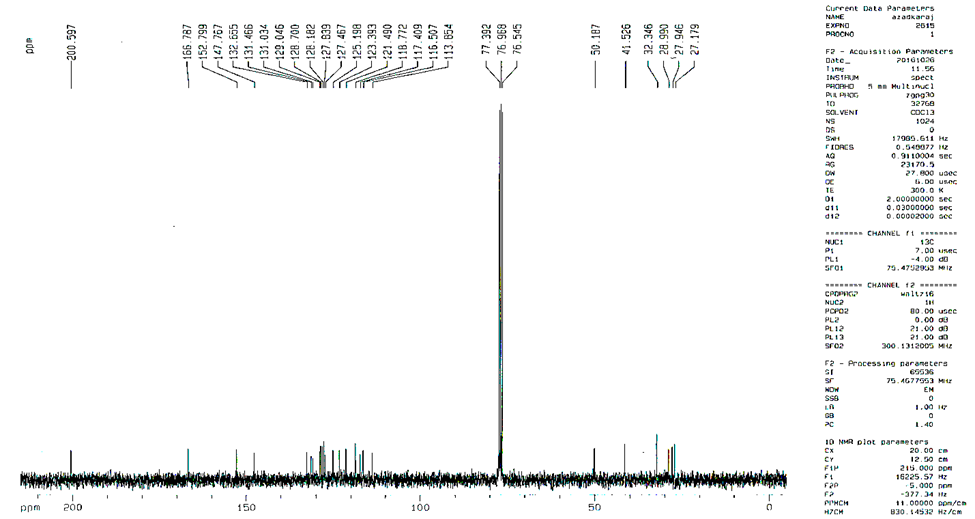** |
| **13C NMR of 4a** |
|  |
| **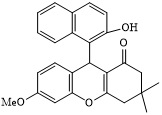**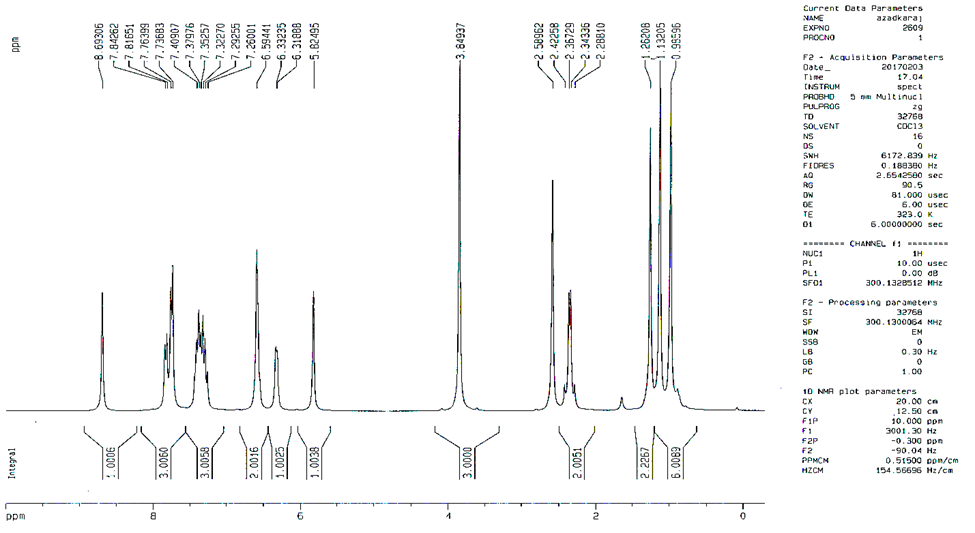 |
| **1H NMR of 4b** |
|  |
| **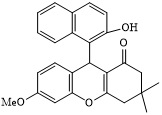**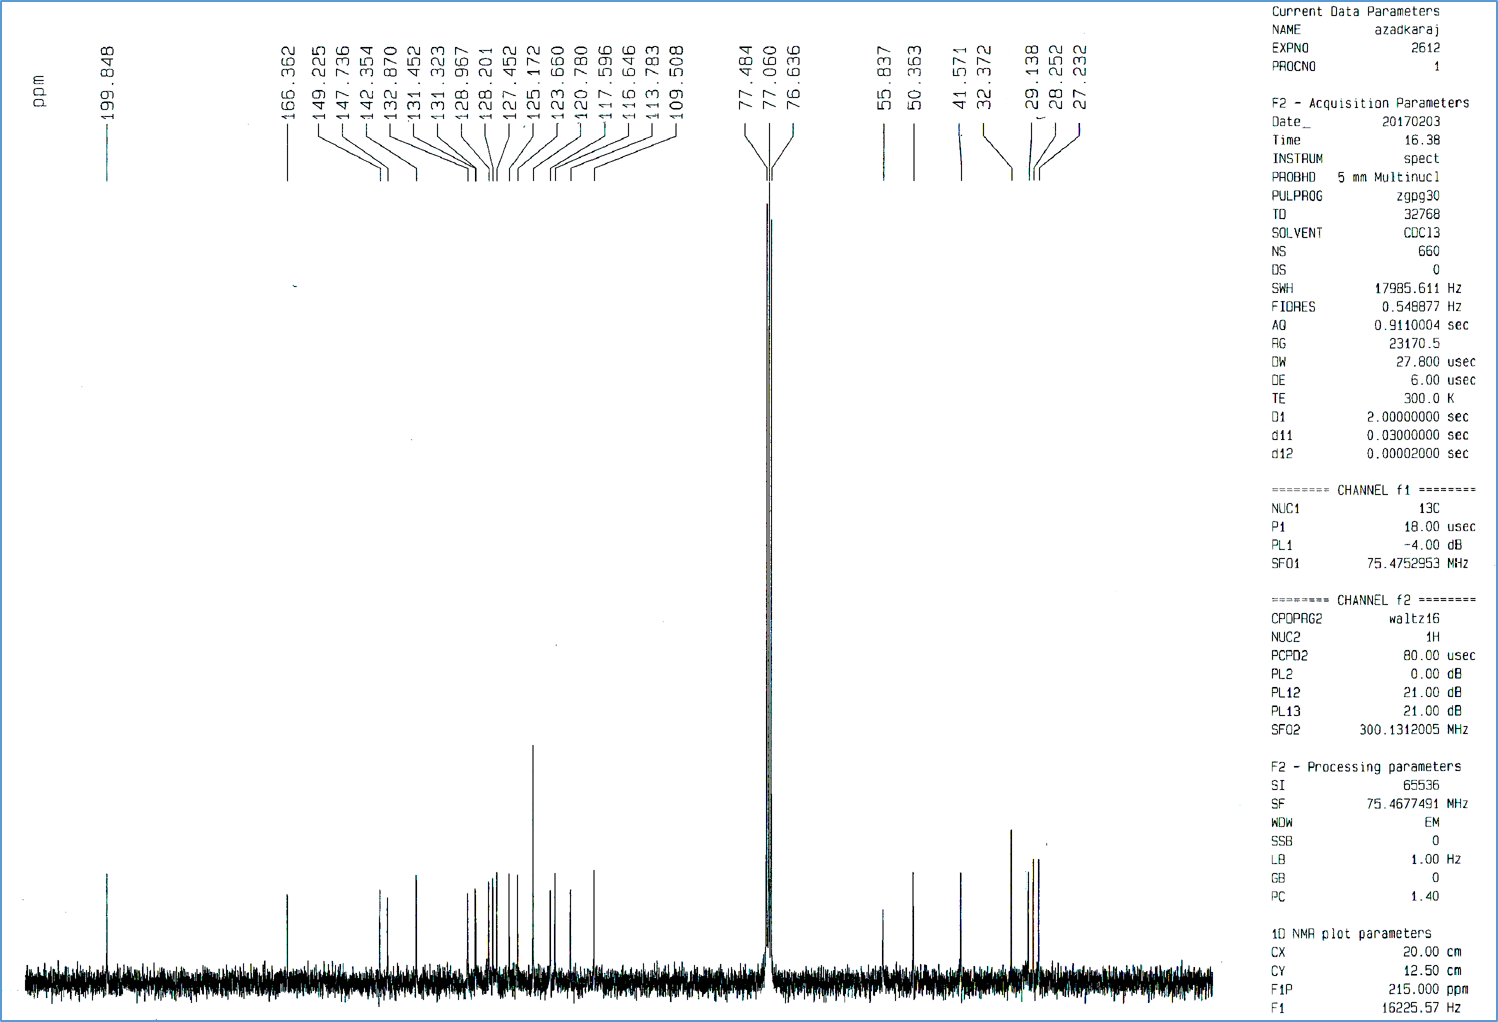 |
| **13C NMR of 4b** |
|  |
| **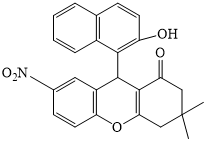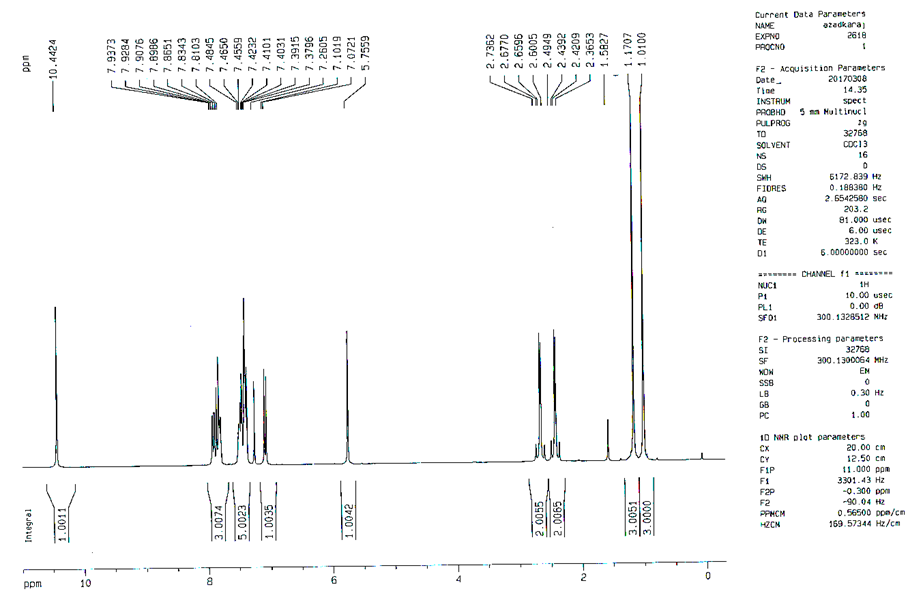** |
| **1H NMR of 4c** |
| **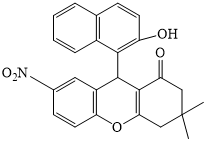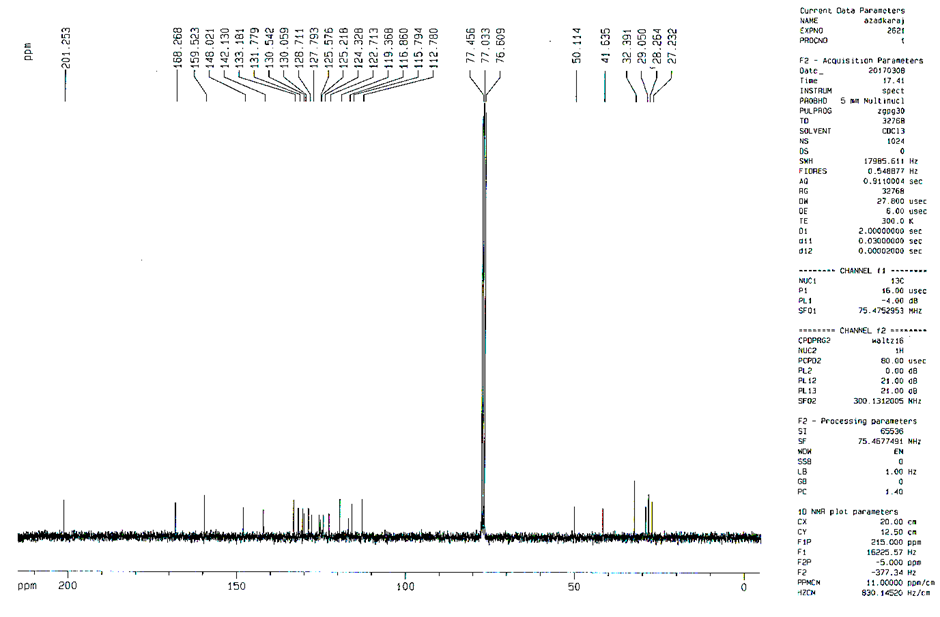** |
| **13C NMR of 4c** |
|  |
| **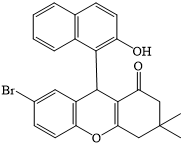**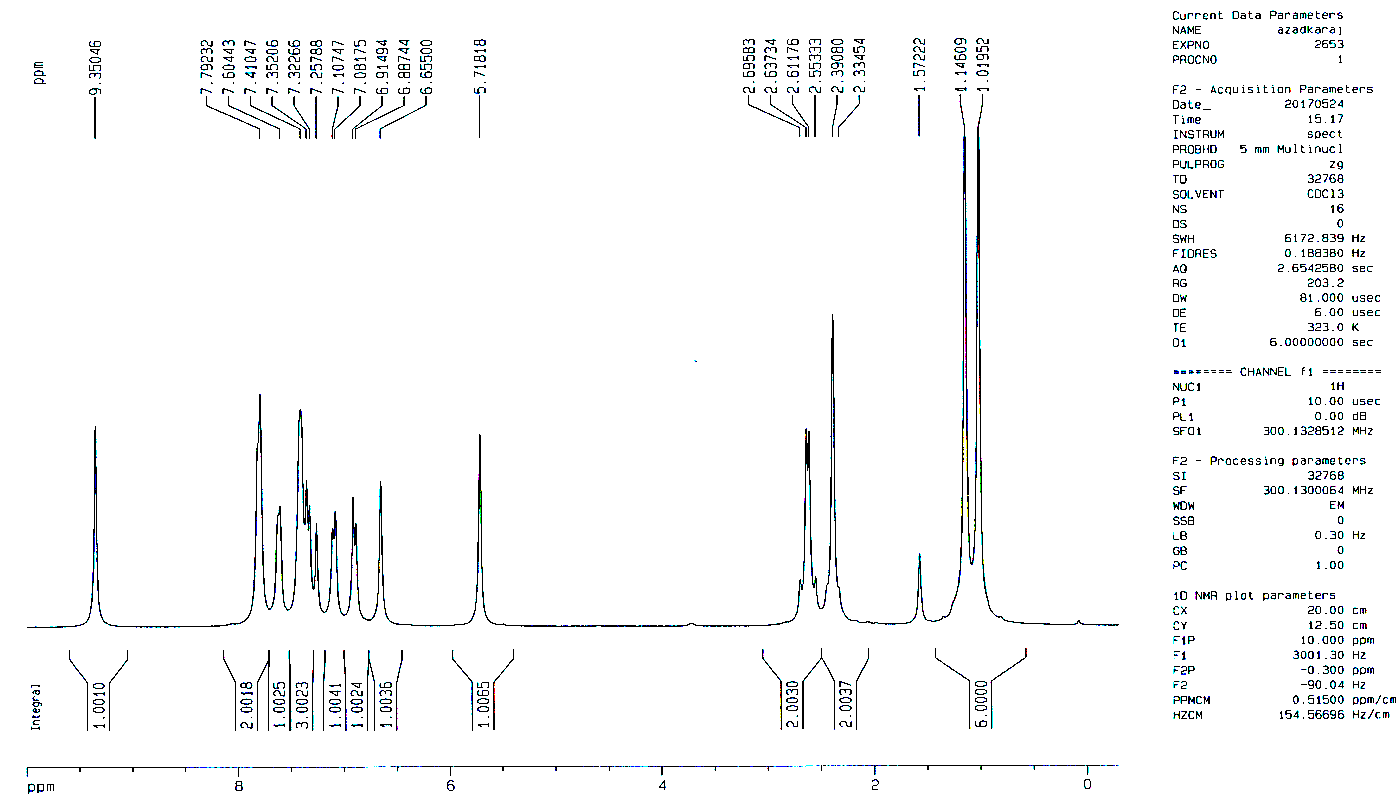 |
| **1H NMR of 4d** |
|  |
| **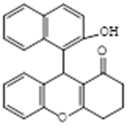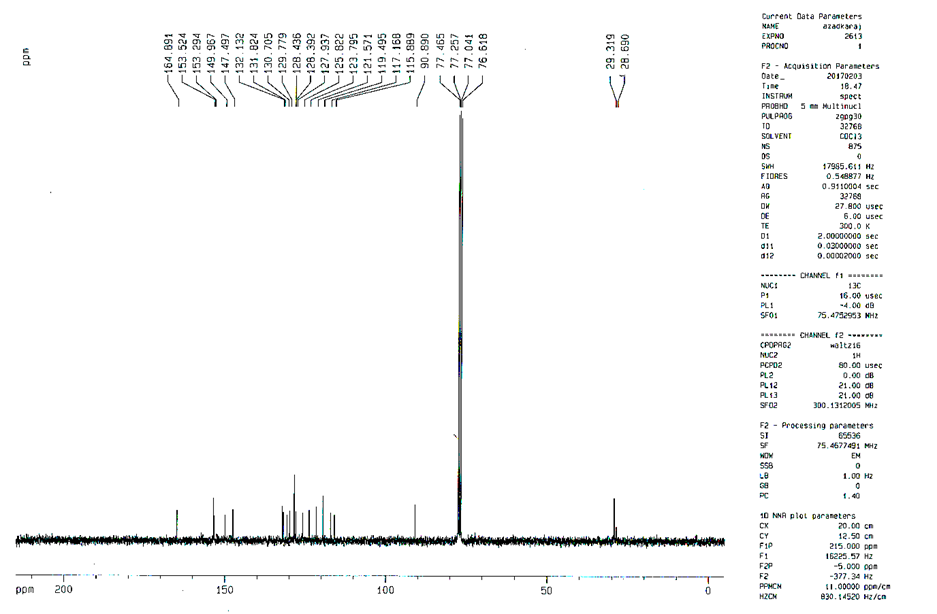** |
| **13C NMR of 4e** |
|  |
| **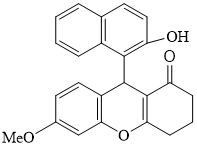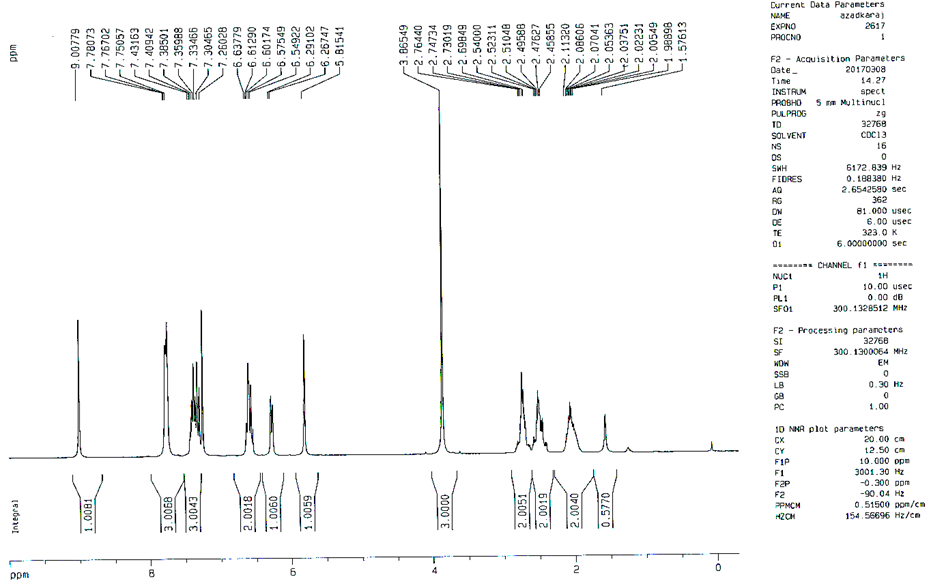** |
| **1H NMR of 4f** |
| **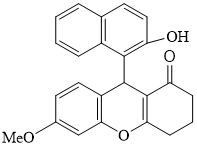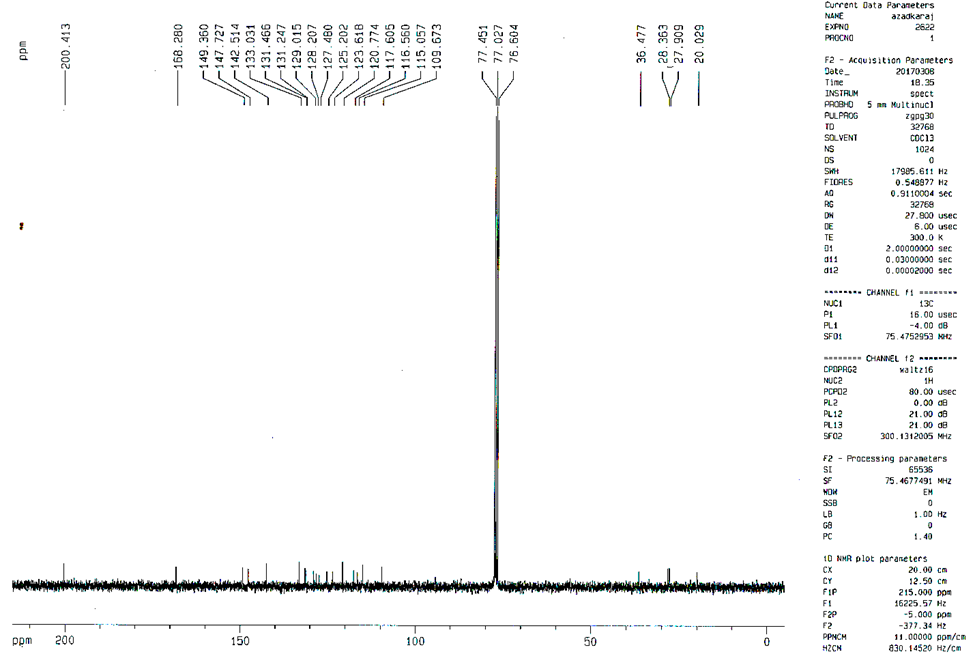** |
| **13C NMR of 4f** |
|  |
| **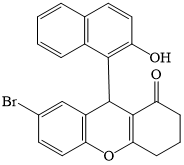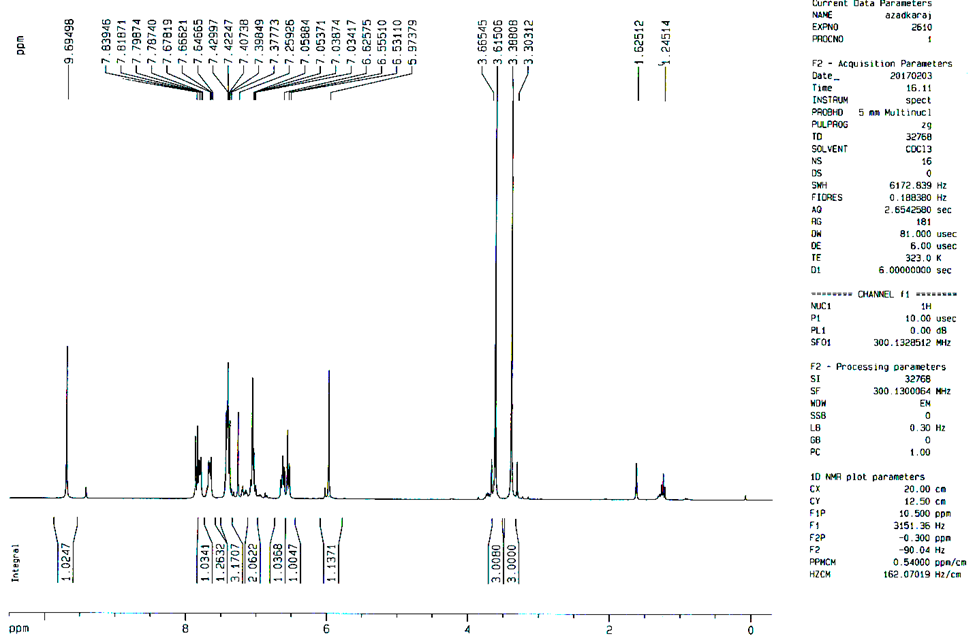** |
| **1H NMR of 4g** |
|  |
| **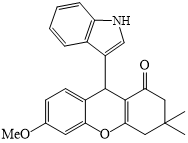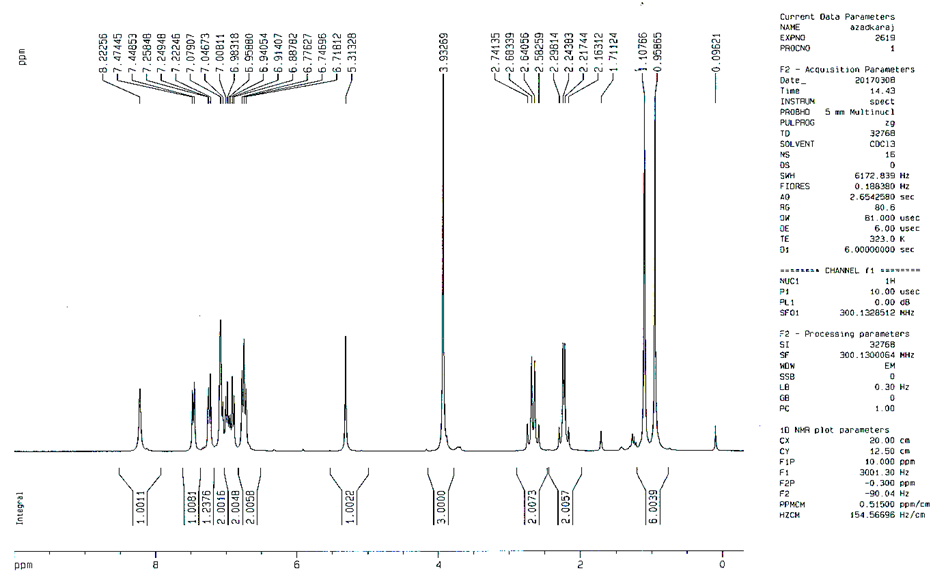** |
| **1H NMR of 4i** |
| **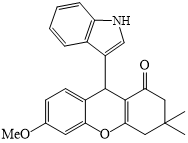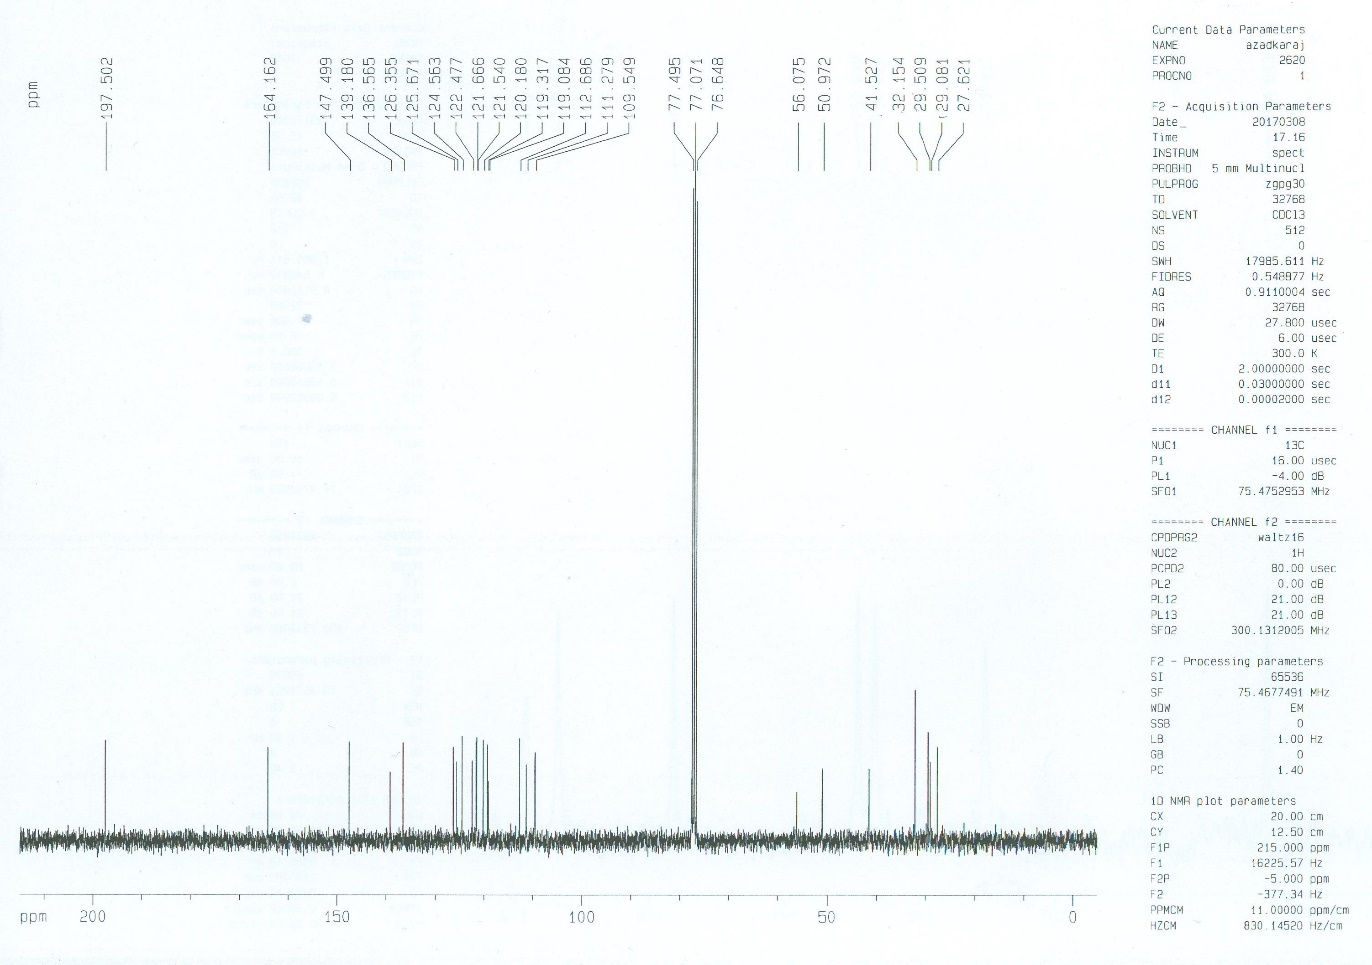** |
| **13C NMR of 4i** |
|  |
| **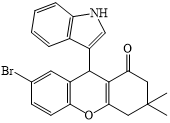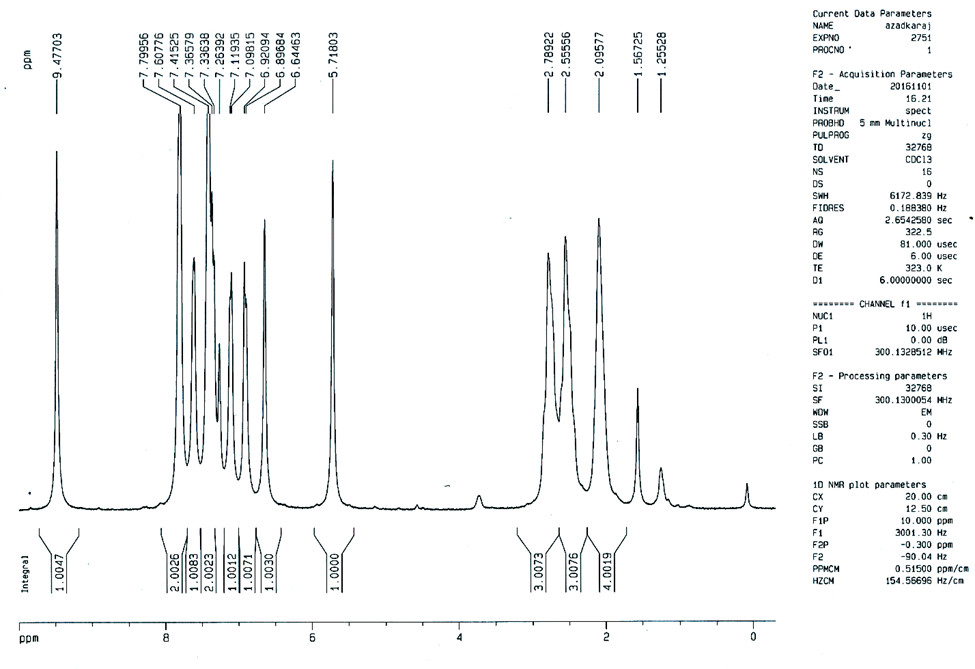** |
| **1H NMR of 4j** |
|  |
| **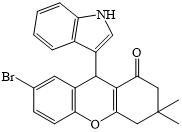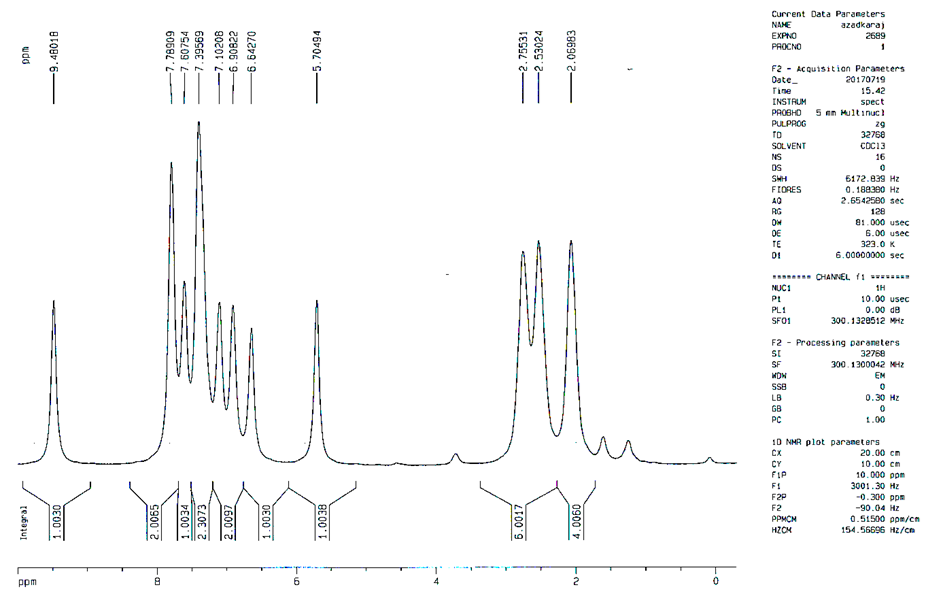** |
| **1H NMR of 4k** |
|  |
|  |
| **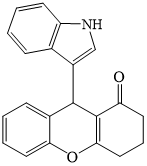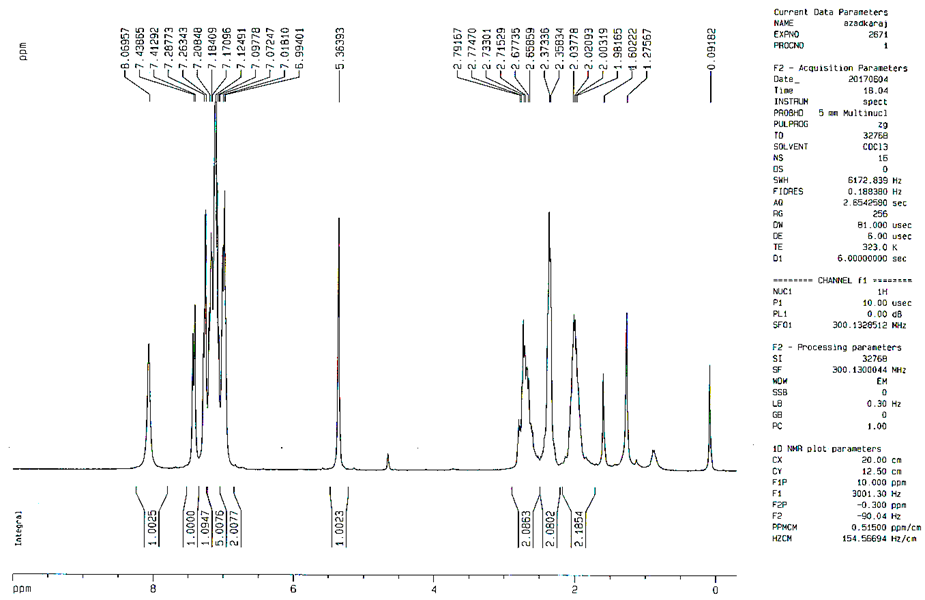** |
| **1H NMR of 4l** |
| **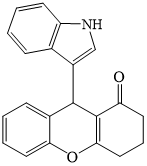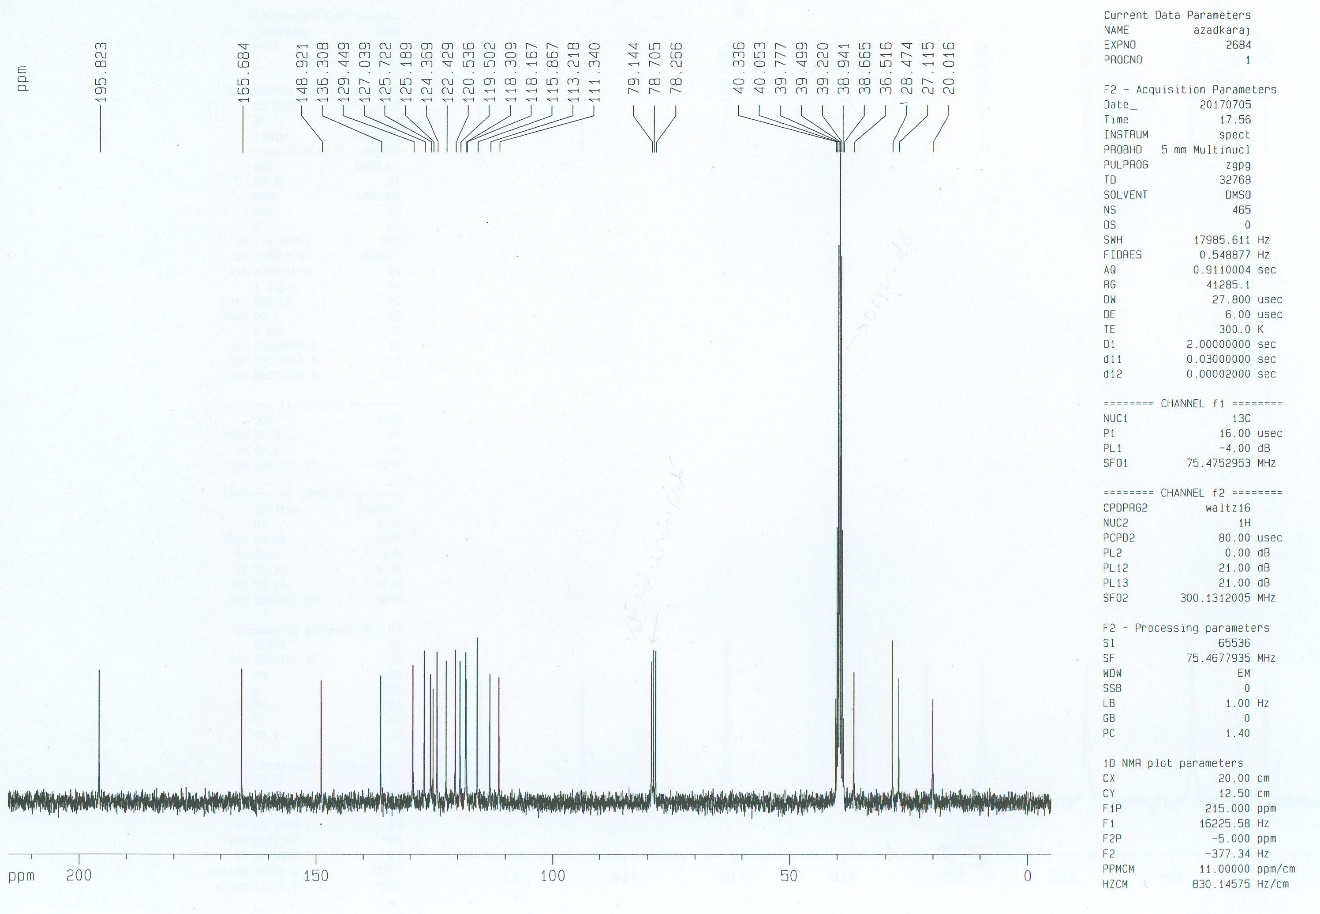** |
| **13C NMR of 4l** |
|  |
|  |
|  |
|  |
| **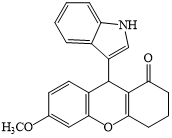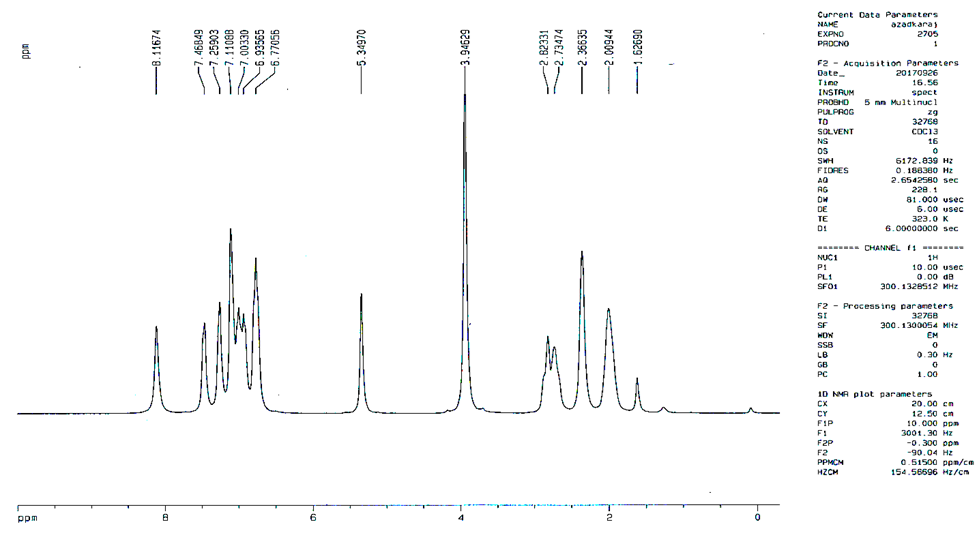** |
| **1H NMR of 4m** |
|  |
| 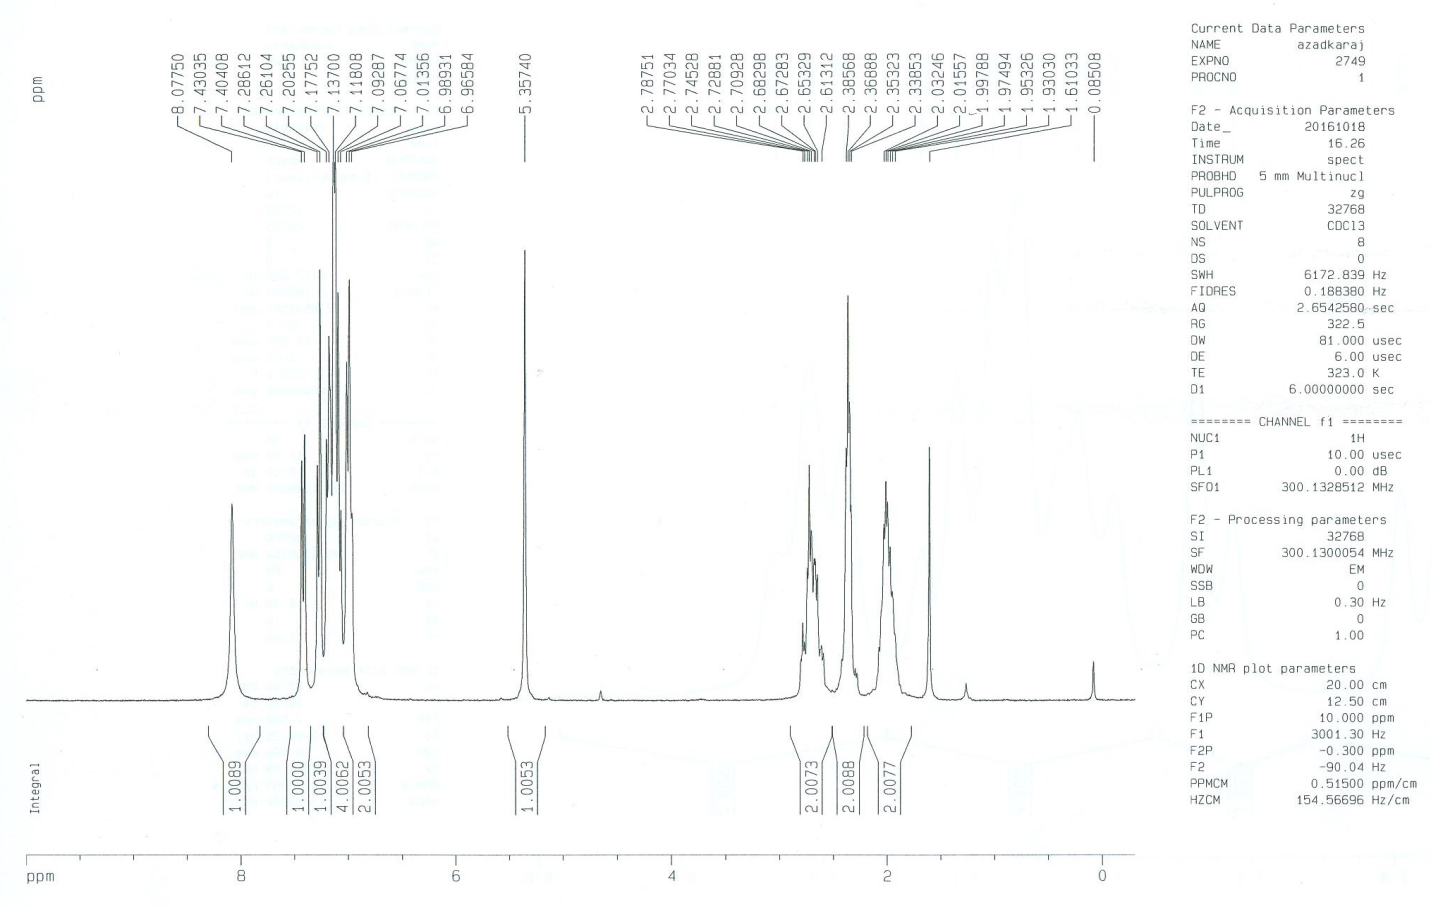 |
| **1H NMR of 4n** |
|  |
| **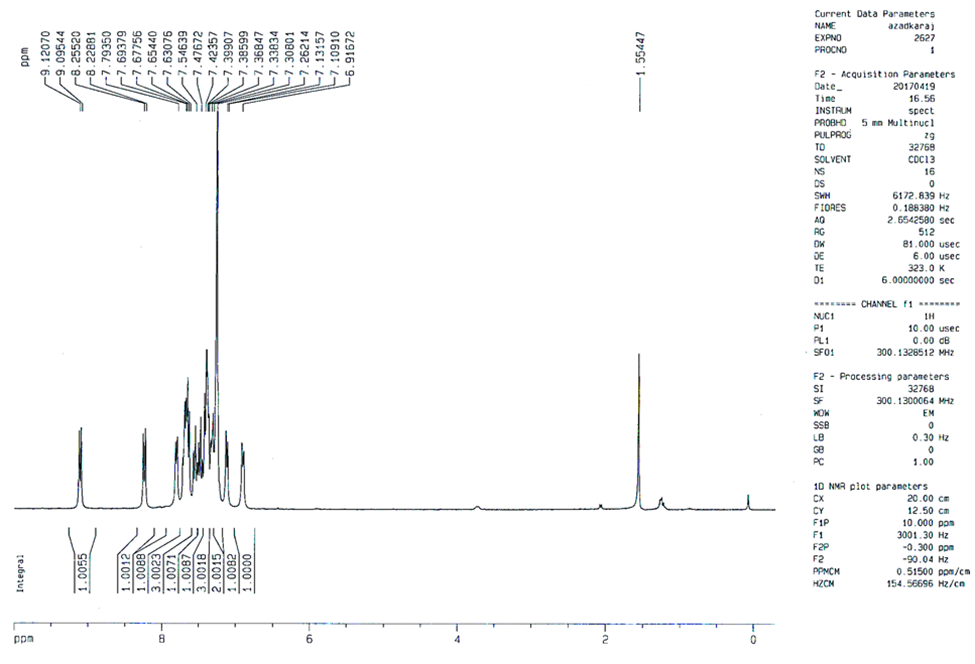** |
| **1H NMR of 4o** |
| 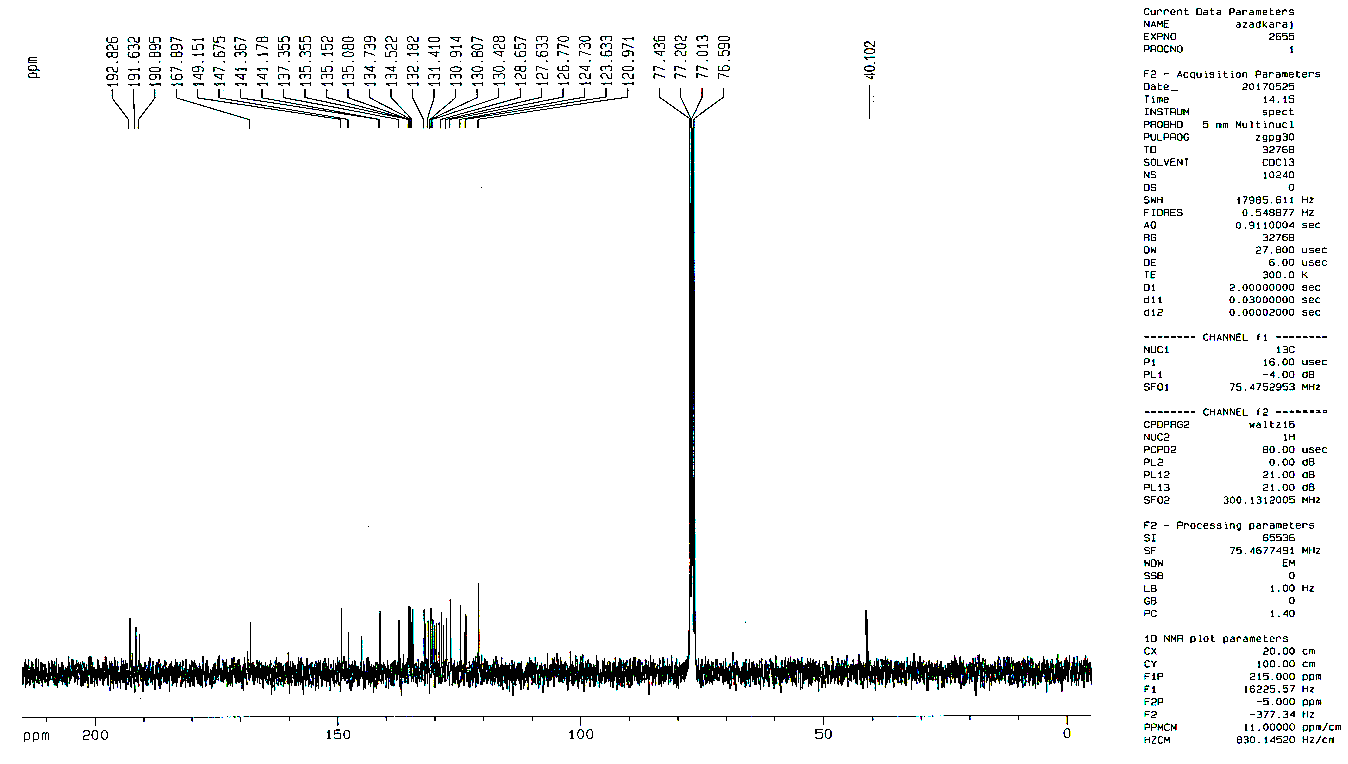 |
| **13C NMR of 4o** |
|  |
| **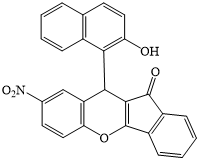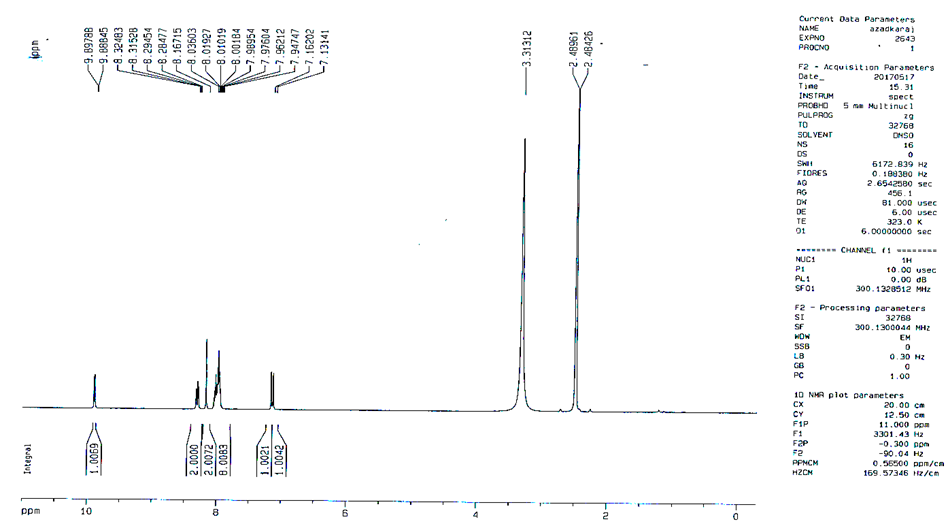** |
| **1H NMR of 4p** |
|  |
| **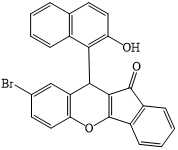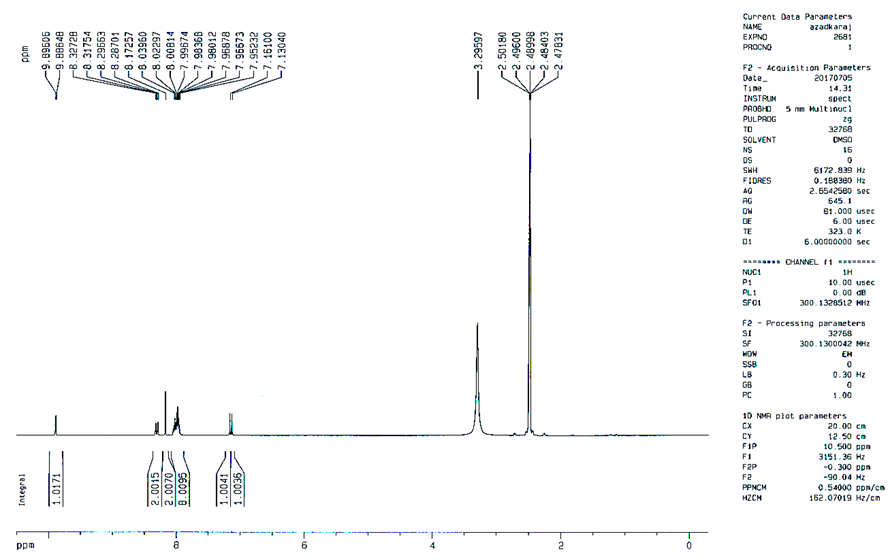** |
| **1H NMR of 4q** |
|  |

**S11. Mass spectra of some selected compounds:**

| **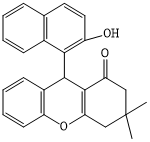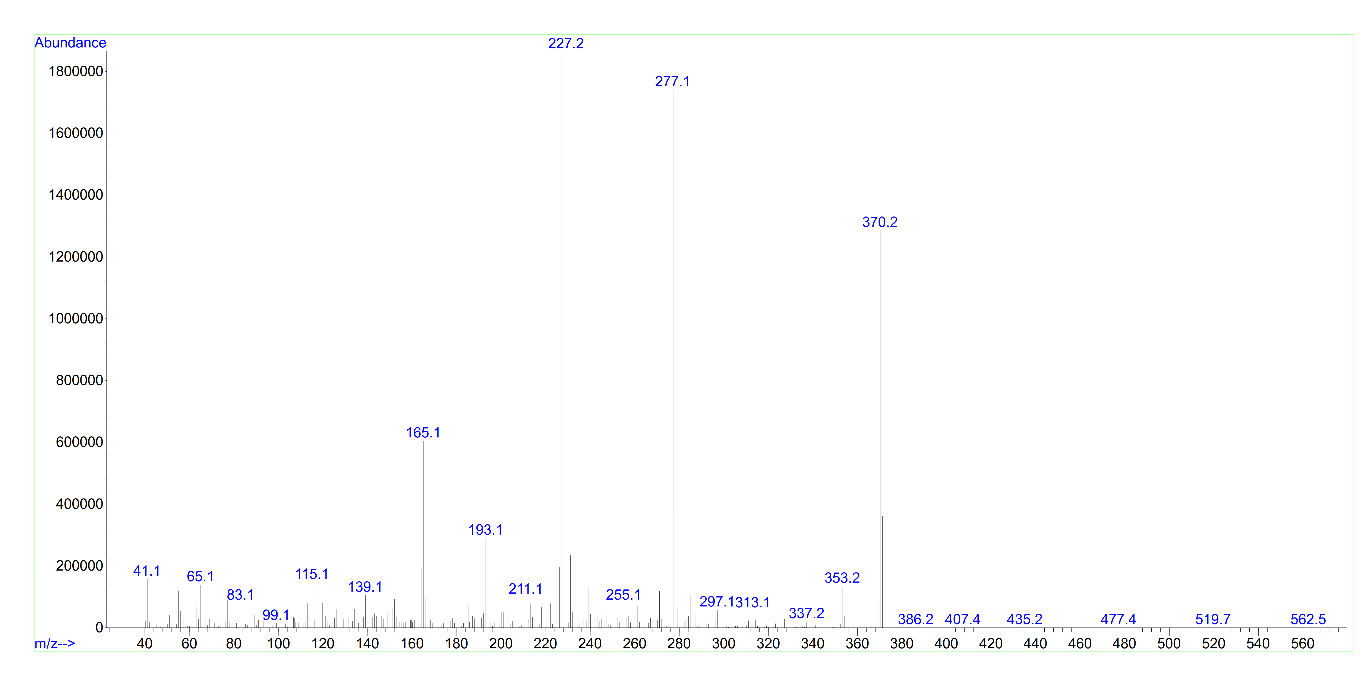** |
| --- |
| **Mass spectra of 4a** |
|  |
| **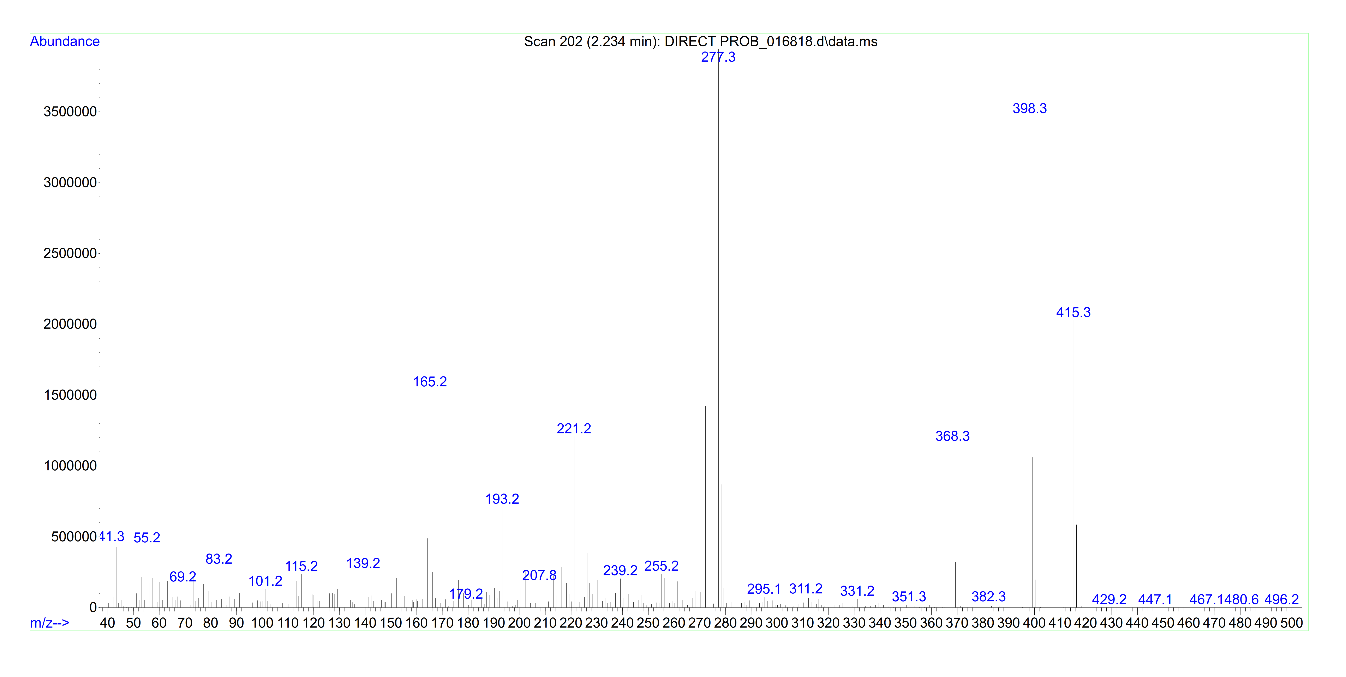** |
| **Mass spectra of 4c** |
|  |
| **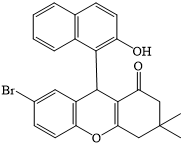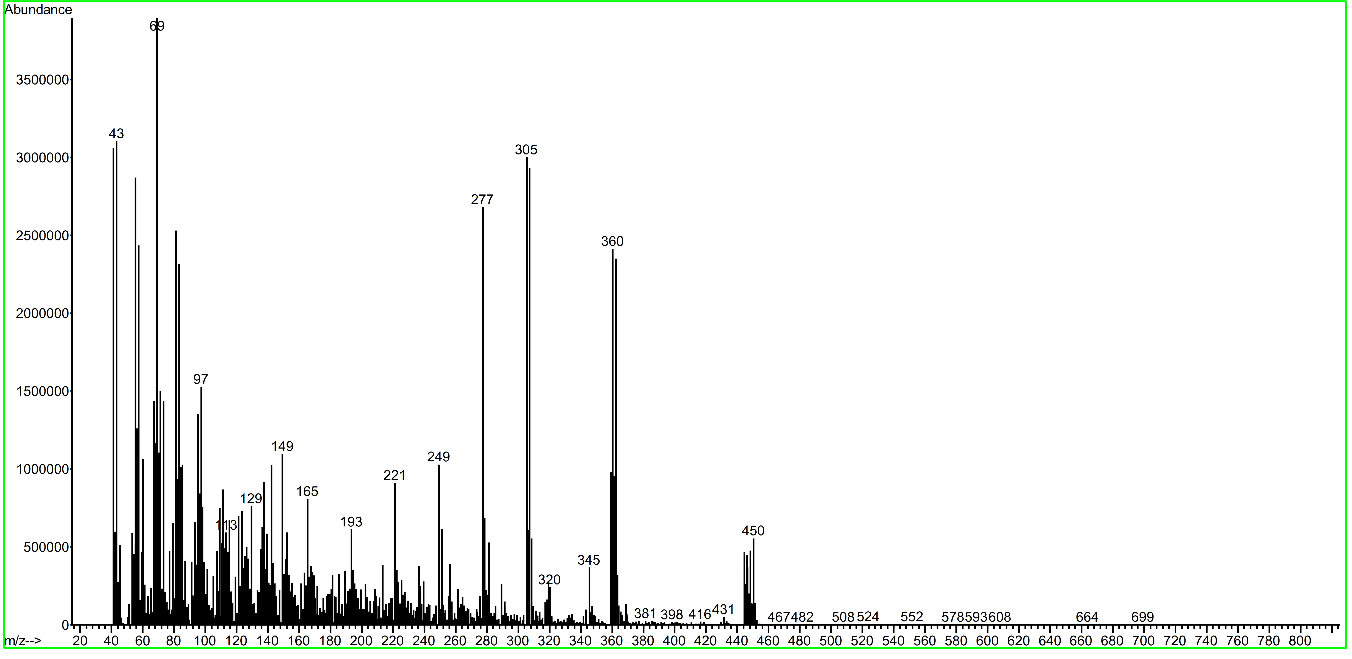** |
| **Mass spectra of 4d** |
|  |
| **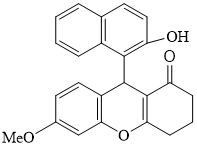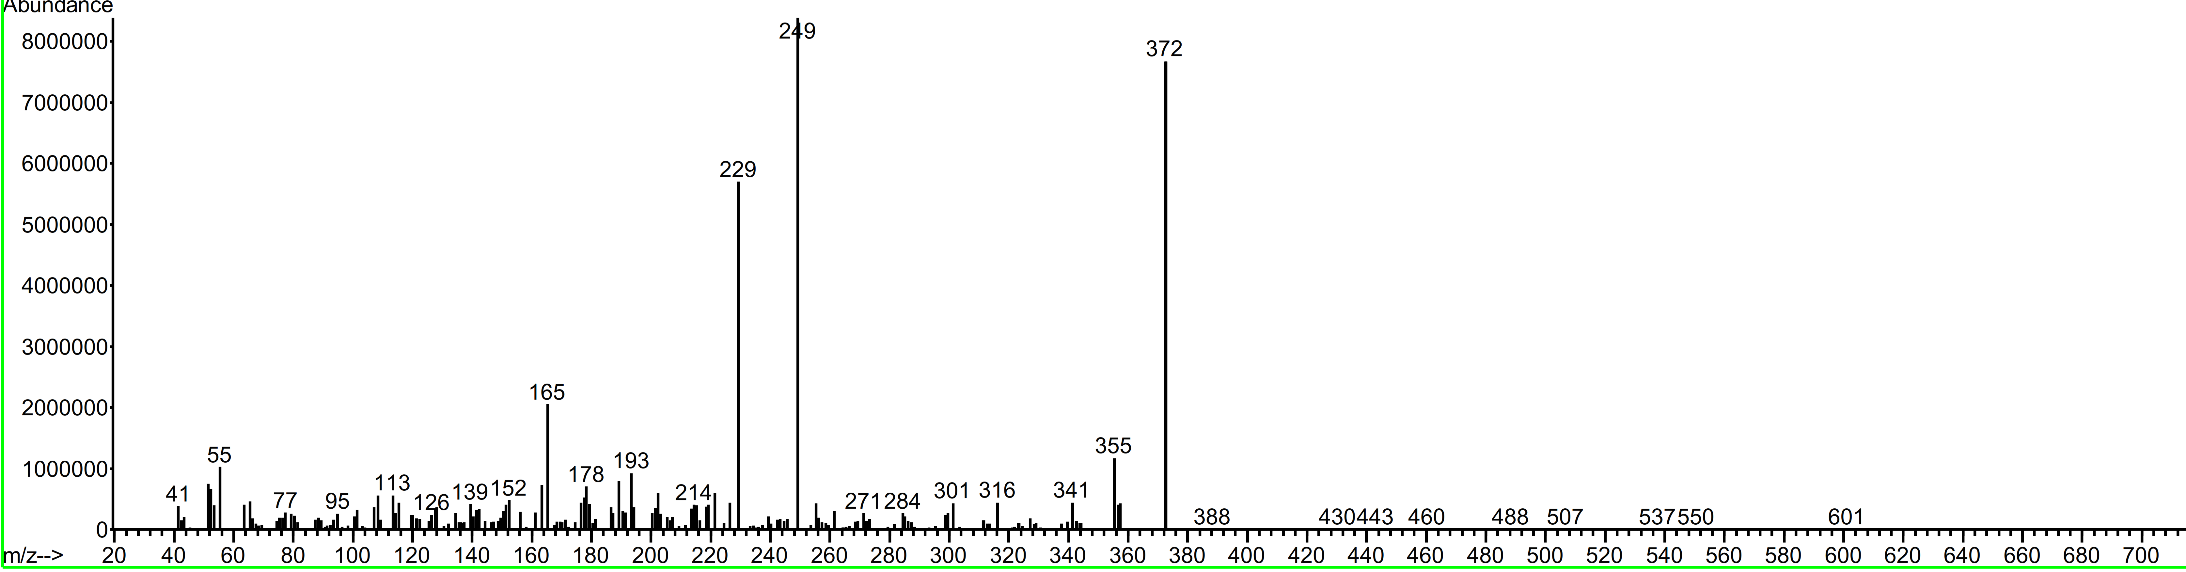** |
| **Mass spectra of 4f** |

**S12. CHNS analysis of some selected compounds:**

| **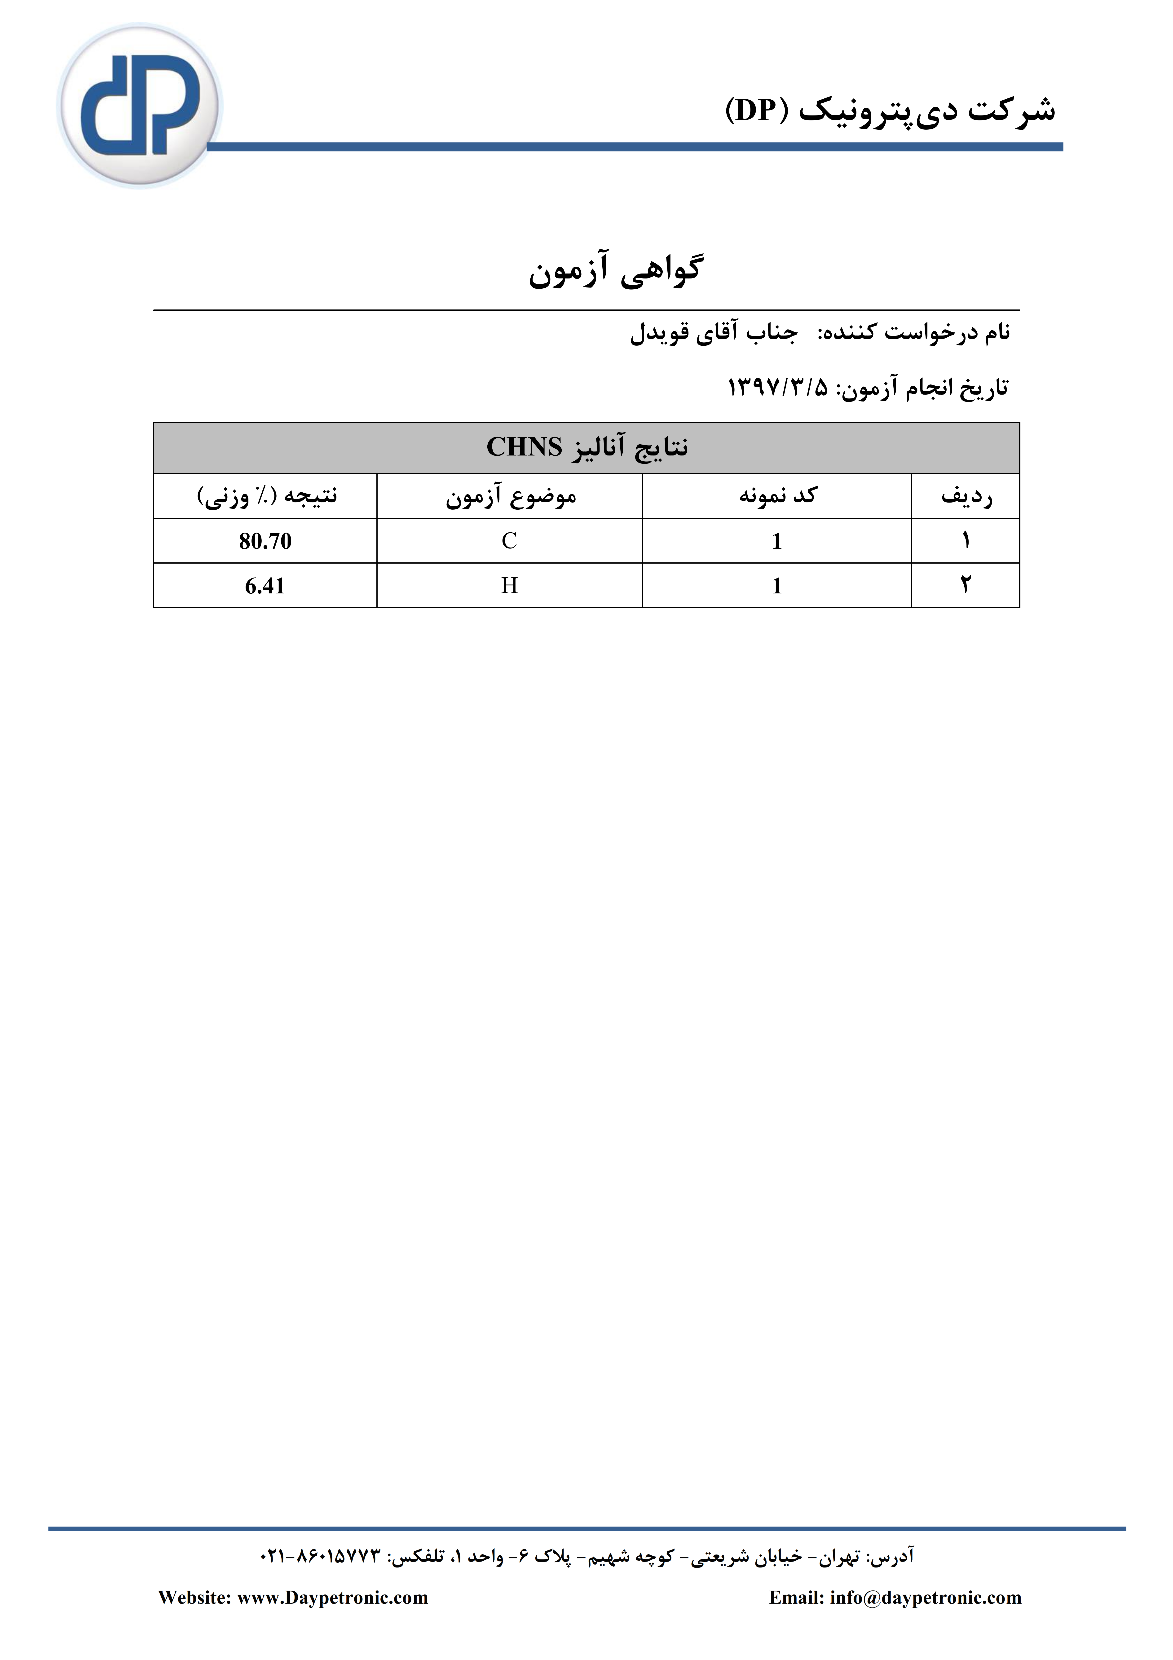** |
| --- |
| **CHNS analysis of 4a** |
|  |
| **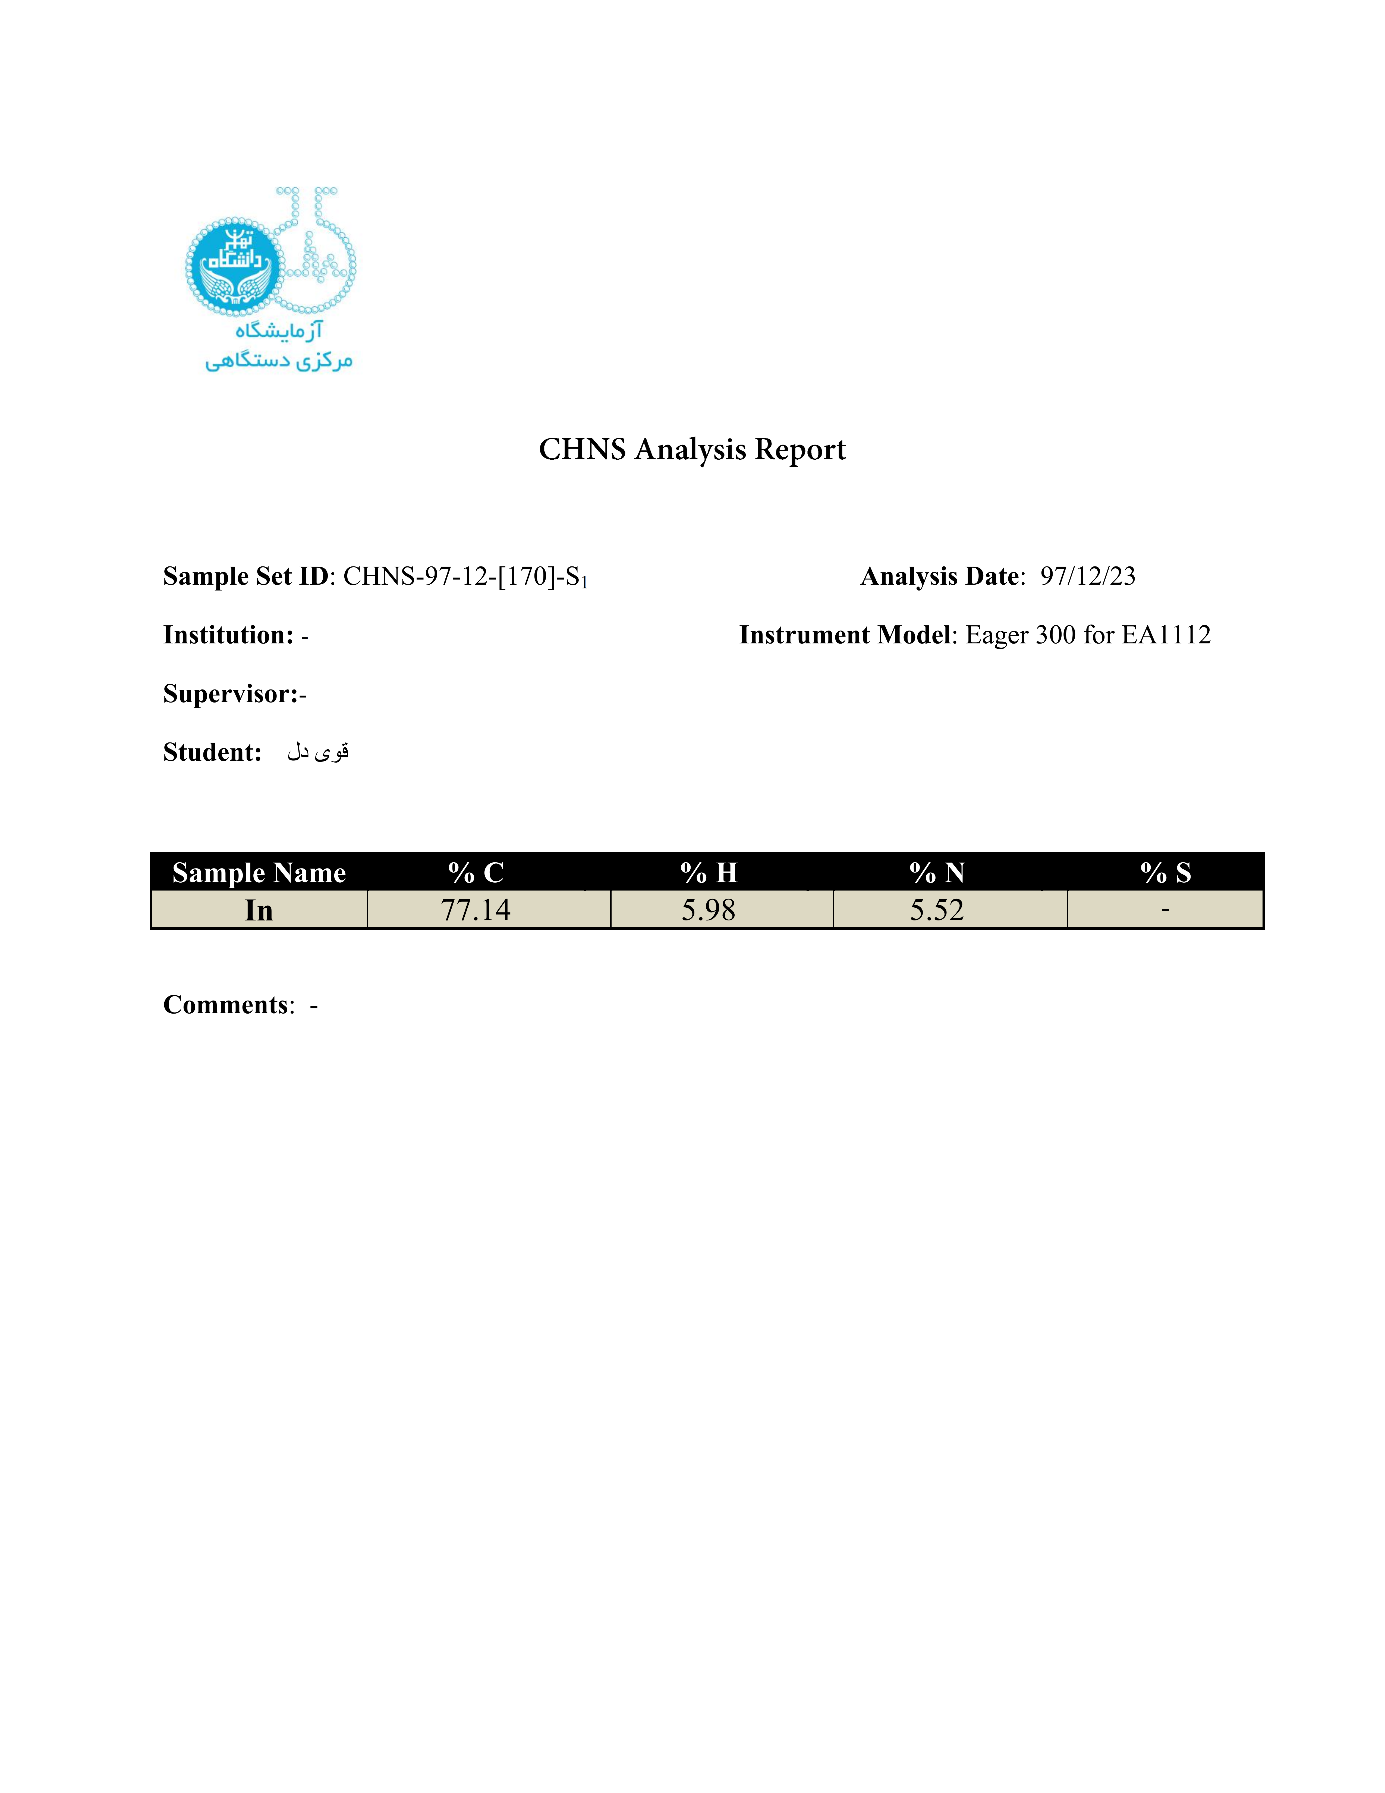** |
| **CHNS analysis of 4l** |
